# Supplementary material
Source: PubMed Central journal article supplement (PMC7816766)
Supplement: jm0c01705_si_001.pdf [file jm0c01705_si_001.pdf]

## Supporting Information

### Discovery of Novel Azetidine Amides as Potent Small Molecule STAT3 Inhibitors

Christine Brotherton-Pleiss<sup>1,2,§</sup>, Peibin Yue<sup>1,3,4,§</sup>, Yinsong Zhu<sup>3,4</sup>, Kayo Nakamura<sup>2</sup>, Weiliang Chen<sup>2</sup>, Wenzhen Fu<sup>1,2</sup>, Casie Kubota<sup>1</sup>, Jasmine Chen<sup>1</sup>, Felix Alonso-Valenteen<sup>4,5</sup>, Simoun Mikhael<sup>4,5</sup>, Lali Medina-Kauwe<sup>4,5</sup>, Marcus A. Tius<sup>1,2</sup>, Francisco Lopez-Tapia<sup>1,2,\*</sup>, and James Turkson<sup>1,3,4,\*</sup>

<sup>1</sup>Cancer Biology Programs, University of Hawaii Cancer Center, University of Hawaii, Manoa, Honolulu, HI, USA 96813, <sup>2</sup>Department of Chemistry, University of Hawaii, Manoa, Honolulu, HI, USA 96825; <sup>3</sup>Department of Medicine, Division of Oncology, and <sup>4</sup>Cedars-Sinai Cancer, Cedars-Sinai Medical Center, Los Angeles, CA 90048, <sup>5</sup>Department of Biomedical Sciences, Cedars-Sinai Medical Center, Los Angeles, CA 90048

Running Title: **Novel Azetidine-based STAT3 Inhibitors**

Keywords: STAT3, Azetidine, Small Molecule Inhibitors, Breast Cancer

This work was supported by NIH/NCI R01 CA208851 (JT), LEIDOS Biomedical Research/NCI Contract 19X122Q (JT), and Cedars-Sinai Start-up funds (JT).

<sup>§</sup>These authors contributed equally.

#### Contents:

Supplementary Results and Discussion

Chemistry

Figures

Tables

Ancillary Information

References

## Supplementary Results and Discussion:

Previously reported analogs (Fig. S1) showed relatively improved inhibitory potency in our STAT3 DNA-binding activity/electrophoretic mobility shift assay (EMSA), with  $IC_{50}$  of  $1.80 \pm 0.94$  and  $2.4 \pm 0.2$   $\mu$ M for compounds **1** and **3**, respectively <sup>1</sup>.

## Chemistry

The general preparation of the benzoic acid and salicylic acid analogs is illustrated by the synthesis of (*R*)-4-(*N*-(4-cyclohexylbenzyl)-1-((perfluorophenyl)sulfonyl)azetidino-2-carboxamido)-2-hydroxybenzoic acid **5a** and is illustrated in Scheme 1. Synthesis of acid chloride **13** began with commercially available (*R*)-1-(*tert*-butoxycarbonyl)azetidino-2-carboxylic acid. Esterification of the acid using potassium carbonate and benzyl bromide provided the corresponding benzyl ester. Deprotection of the amine followed by sulfonamide formation with pentafluorobenzenesulfonyl chloride provided ester intermediate **11**. Hydrogenolysis of the benzyl ester provided acid **12** in 73% overall yield, which was cleanly converted to the acid chloride **13** using oxalyl chloride and catalytic DMF. Pre-treatment of aniline **14** <sup>2</sup> with methylmagnesium bromide to form the corresponding magnesium amide salt followed by its reaction with excess acid chloride **13** provided protected anilide intermediate **15** in 70% yield. Both *O*-benzyl-protecting groups could be cleanly removed by catalytic hydrogenolysis at atmospheric pressure to afford the final product, salicylic acid **5a**. The *S*-enantiomer (**5b**) was also prepared. Before the final hydrogenolysis step, normal-phase chiral HPLC was used to determine the enantiomeric purity of intermediate **15** which was greater than 95%. The sodium salt (**5d**) was prepared by treating **5a** with sub-stoichiometric amounts of sodium bicarbonate in 1:1:1 THF: methanol: water.

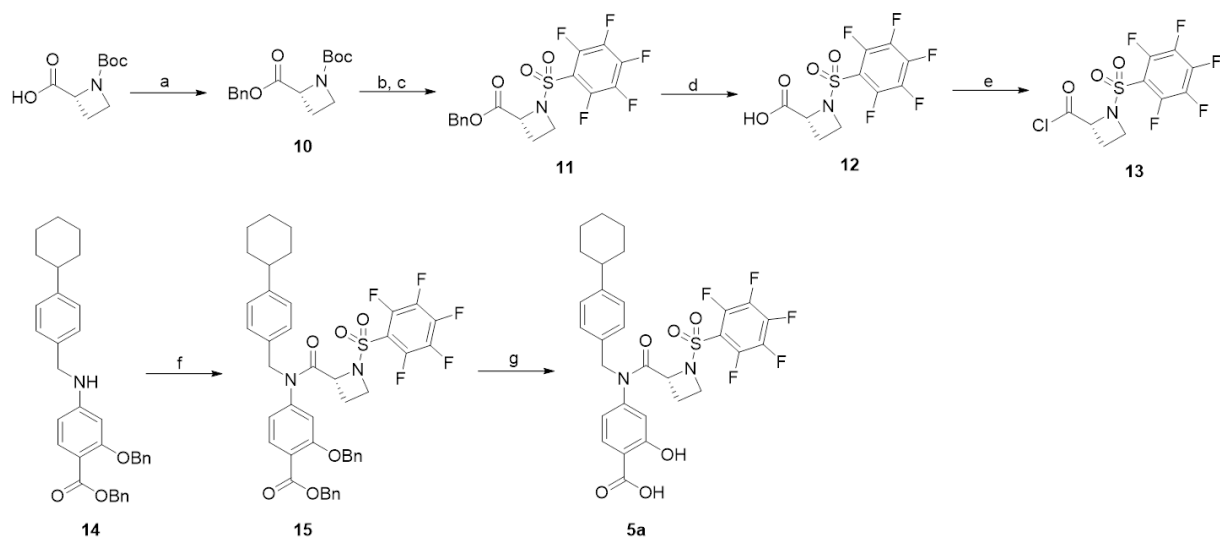

Scheme 1. Reagents and conditions: a) BnBr (0.95 eq),  $K_2CO_3$  (1.1 eq), DMF, rt, 14 h, 97%; b) 1:5 TFA:DCM, 0 °C, rt, 14 h; c) DIPEA (3.0 eq), perfluorobenzenesulfonyl chloride (1.3 eq), DCM, rt, 5.5 h, 75%; d)  $H_2$ , 20% Pd(OH) $_2$ /C, EtOAc/MeOH, rt, 2 h, 100%; e) oxalyl chloride, DMF (cat.), DCM, 3.5 h, 99%; f) MeMgBr (1.2 – 2.5 eq), THF, 0 °C, 5 min, then **13**, rt, 7 h, 70%; g)  $H_2$ , 20% Pd(OH) $_2$ /C, EtOAc/MeOH, rt, 1 h, 99%

Similarly, analogs **5e-5t** (Table 1) and **6a-6l** (Table 2) were prepared from the corresponding anilines, an example of which is illustrated in Scheme 2 in the preparation of **5o** and **7d**. Alkylation of benzyl 2-(benzyloxy)-4-(2,2,2-trifluoroacetamido)benzoate (**16a**) with 5-bromo-2-(bromomethyl)pyridine provided the protected anilide **17a**, which on deprotection with potassium carbonate in methanol/THF provided aniline **18a** in 74% overall yield. Treatment of the aniline with excess methylmagnesium bromide followed by coupling with acid chloride **13** afforded the desired anilide **19a** in 55% yield. A Suzuki reaction with 2-(cyclohex-1-en-1-yl)-4,4,5,5-tetramethyl-1,3,2-dioxaborolane using palladium acetate and S-Phos gave cyclohexenylpyridylmethyl intermediate, **20a** in 88% yield. Catalytic hydrogenation resulted in saturation of the cyclohexenyl double bond and concurrent hydrogenolysis of the benzyl protecting groups to provide analog **5o**. The methyl ester analogs (Table 3) were prepared in a similar manner as illustrated in Scheme 2 with the synthesis of **7d**.

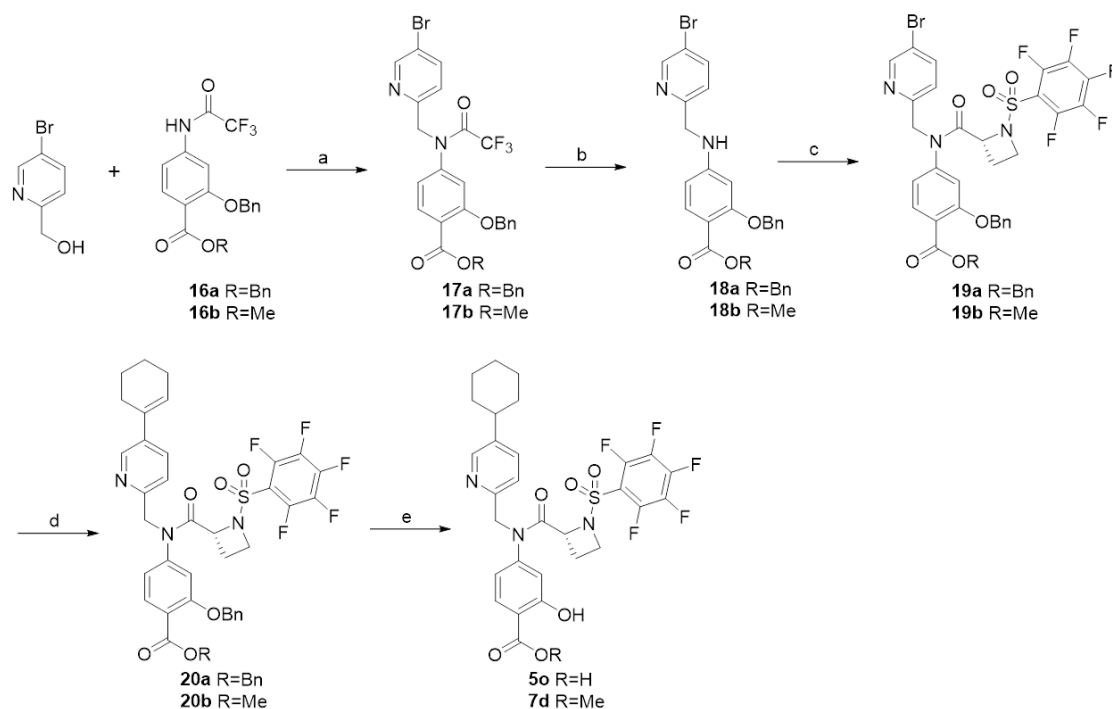

Scheme 2. Reagents and conditions: a)  $K_2CO_3$ ,  $CH_3CN$ ,  $60\text{ }^\circ\text{C}$ ; b)  $K_2CO_3$ , MeOH, THF, 74% 2 steps; c) *i.* MeMgBr (1.2 – 2.5 eq), THF,  $0\text{ }^\circ\text{C}$ , 5 min, *ii.* **13** (1.5 eq), rt, 55%; d) 2-(cyclohex-1-en-1-yl)-4,4,5,5-tetramethyl-1,3,2-dioxaborolane (1.8 eq),  $K_3PO_4$  (2 eq),  $Pd(OAc)_2$  (0.05 eq), SPhos (0.1 eq), dioxane,  $40\text{ }^\circ\text{C}$ , 88%; e)  $H_2$ , 10% Pd/C, MeOH/EtOAc.

Amides and hydroxamic acid analogs (Table 4) were prepared in a similar manner as illustrated in the preparation of amide **8q** and hydroxamic acid **8i** (Scheme 3). Building block **22**, 2-(chloromethyl)-5-cyclohexylpyridine, was prepared from (5-bromopyridin-2-yl)methanol by a cross-coupling reaction with 1-cyclohexene-1-yl-boronic acid followed by hydrogenation of the cyclohexenyl double bond to provide alcohol **21**, which was converted to the chloride **22** by reaction with excess thionyl chloride in 94% overall yield. Alkylation of methyl 2-(benzyloxy)-4-(2,2,2-trifluoroacetamido)benzoate **16b** with chloride **22** in acetonitrile with potassium carbonate and catalytic sodium iodide provided trifluoroacetamide **23** in **50% yield**. Deprotection under mild conditions using potassium carbonate in methanol/THF provided aniline **24** which was coupled with the azetidine acid chloride **13** to afford anilide **25** in 85% yield. Mild and selective hydrolysis conditions using trimethyltin hydroxide<sup>3</sup> provided acid **26** in 61% yield.

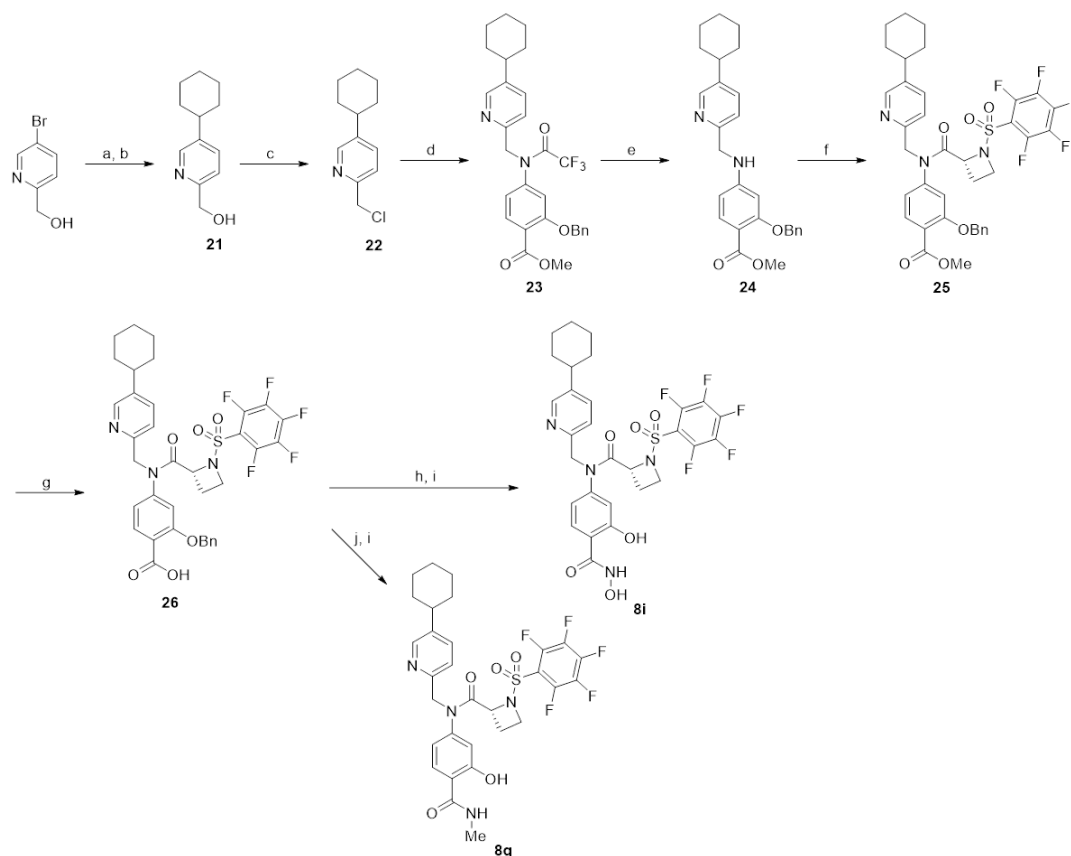

Scheme 3. Reagents and conditions: a) 1-cyclohexene-1-yl-boronic acid (1.5 eq),  $K_3PO_4$  (2 eq),  $H_2O$  (2 eq),  $Pd(OAc)_2$  (0.05 eq), SPhos (0.1 eq), THF, 40 °C, 24 h, 95%; b)  $H_2$ , 10%  $PtO_2$ , MeOH/EtOAc, 4 h, 99%; c)  $SOCl_2$  (1.5 eq), DCM, rt, 3 h, 100%; d) **16b**,  $K_2CO_3$ , MeCN, NaI (cat.), 60 °C, 50%; e)  $K_2CO_3$ , MeOH, THF; f) *i.*  $MeMgBr$  (1.2 – 2.5 eq), THF, 0 °C, 5 min, *ii.* **13** (1.5 eq), rt, 85%; g)  $Me_3SnOH$  (10 eq), DCE, 85 °C, 77 h, 61%; h) *i.* HATU (1.1 eq), DIPEA (2.0 eq), DCM, rt, 75 min, *ii.*  $H_2NOBn.HCl$  (1.1 eq), 5.5 h, 68%; i)  $H_2$ , 10%  $Pd/C$ , MeOH/EtOAc; j) HATU, (1.1 eq), DIPEA (1.9 eq), DCM, rt, 75 min, *ii.*  $MeNH_2.HCl$  (1.1 eq), 14 h, 91%.

HATU mediated coupling with O-benzylhydroxylamine hydrochloride followed by hydrogenolysis of the benzyl protecting groups yielded hydroxamic acid **8i**. Similar coupling with methylamine hydrochloride followed by hydrogenolysis gave the methyl amide **8q**.

The synthesis of the benzo-fused *N*-heterocycle analog quinazolinone **9f** started from 7-nitroquinazolin-4(3*H*)-one **27** which was protected with SEM-Cl using KHMDS as the base in DMF to provide **28** in 70% yield. Iron mediated reduction of the nitro group to the aniline followed by protection with TFAA provided intermediate **30** in 95% yield for two steps. Alkylation of trifluoroacetamide **30** with chloride **22** in acetonitrile with potassium carbonate and catalytic sodium iodide provided intermediate **31** in 62% yield. Mild hydrolysis of the trifluoroacetyl group using potassium carbonate and methanol in THF provided the

desired deprotected aniline **32** in 88% yield. Deprotonation of aniline **32** with methylmagnesium bromide, and subsequent coupling with the azetidine acid chloride **13** gave 86% yield of anilide **33** which upon TFA mediated deprotection of the SEM group provided the final product **9f** in 84% yield.

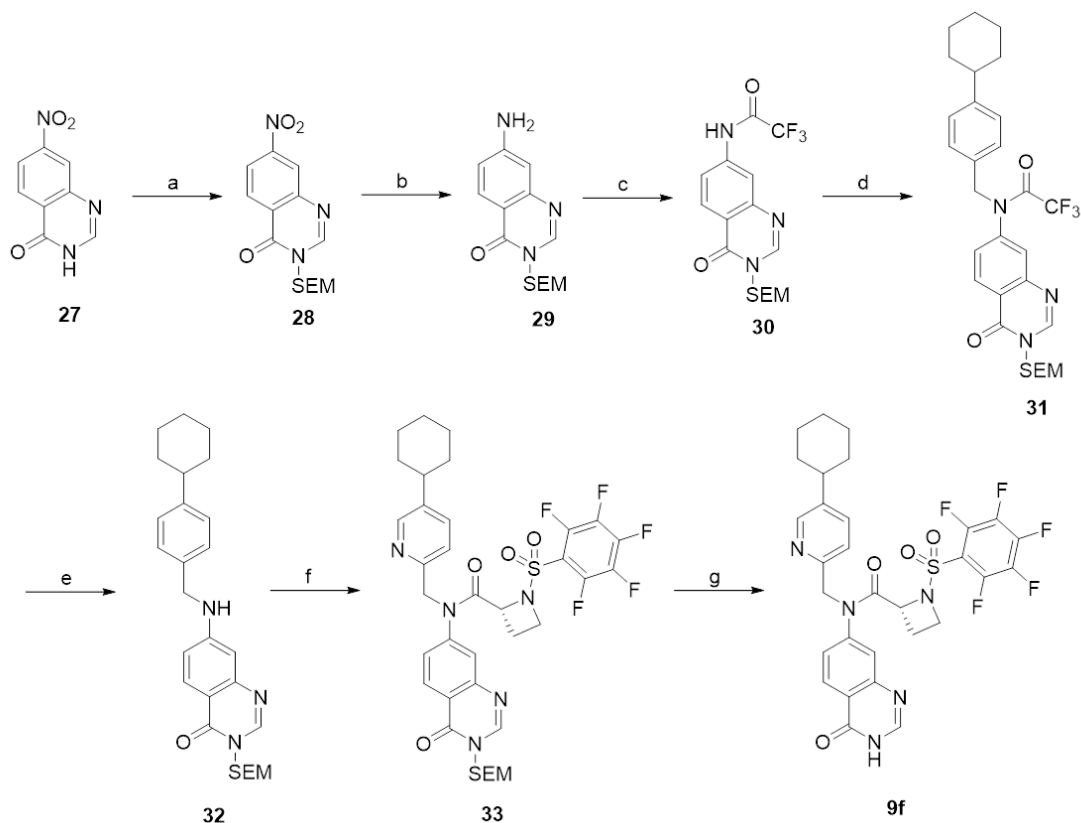

Scheme 4. Reagents and conditions: a) *i.* KHMDS (1.2 eq), DMF, 0 °C; *ii.* SEM-Cl (1.2 eq), rt, 3 h, 70%; b) Fe(0) (42 At eq), 2:1 EtOH/H<sub>2</sub>O, NH<sub>4</sub>Cl (10eq), 66 °C, 16 h; c) TFAA (1.1 eq), Py (2.2 eq), DCM, rt, 1.5 h, 95% two steps; d) **22** (1.4 eq), K<sub>2</sub>CO<sub>3</sub> (2 eq), NaI (0.2 eq), MeCN, 65 °C, 16 h, 62%; e) K<sub>2</sub>CO<sub>3</sub> (2.5 eq), MeOH/THF, rt, 2 h, 88%; f) *i.* MeMgBr (1.2-2.5 eq), THF, 10 min, 0 °C; *ii.* **13**, (1.5 eq), rt, 1 h, 86%; g) 1:1 TFA/DCM, rt, 2h, 84%.

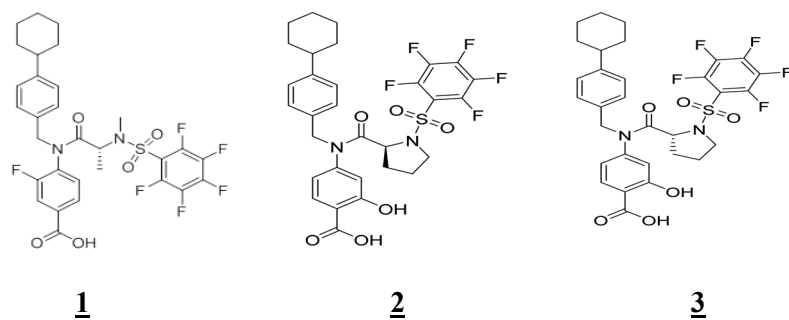

**Fig. S1. Early Leads.** Progression from a proline linker **3**<sup>1</sup> into other cyclic amino acid linkers (Fig. S2) led us to an exciting discovery. Although changing the 5-membered proline analog, **3**, to the corresponding 6-membered piperidic acid analog, **4** (Fig. S2), decreased potency, changing to the 4-membered azetidine-2-carboxylic analog, **5a** (Fig. S2), gave over a four-fold boost in potency *in vitro* against STAT3 DNA-binding activity (Fig. 1A, EMSA IC<sub>50</sub> 0.55 ± 0.01 μM for **5a**).

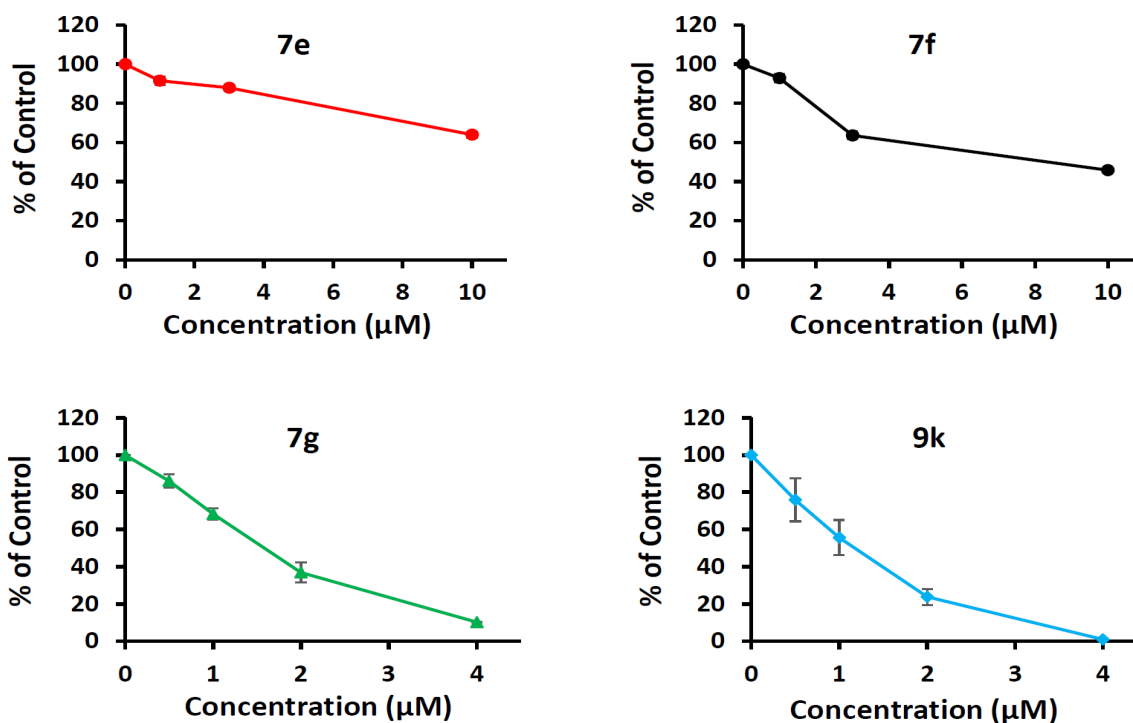

**Fig. S2. Dose-response curves for the cell-free EMSA analysis for the most active compounds.**

Nuclear extracts from NIH3T3/v-Src fibroblasts of equal total protein containing activated STAT3 were pre-incubated with increasing concentrations of the designated compounds for 30 min at room temperature prior to incubating with the radiolabeled hSIE probe that binds STAT3 and performing EMSA analysis; bands corresponding to STAT3:DNA complexes in gel were quantified using ImageJ and represented as percent of control, and plotted against the concentration of compounds, from which  $IC_{50}$  values were determined. Control lanes (0) represent nuclear extracts pre-treated with 10% DMSO. Data representative mean  $\pm$  SD for 2 replicates.



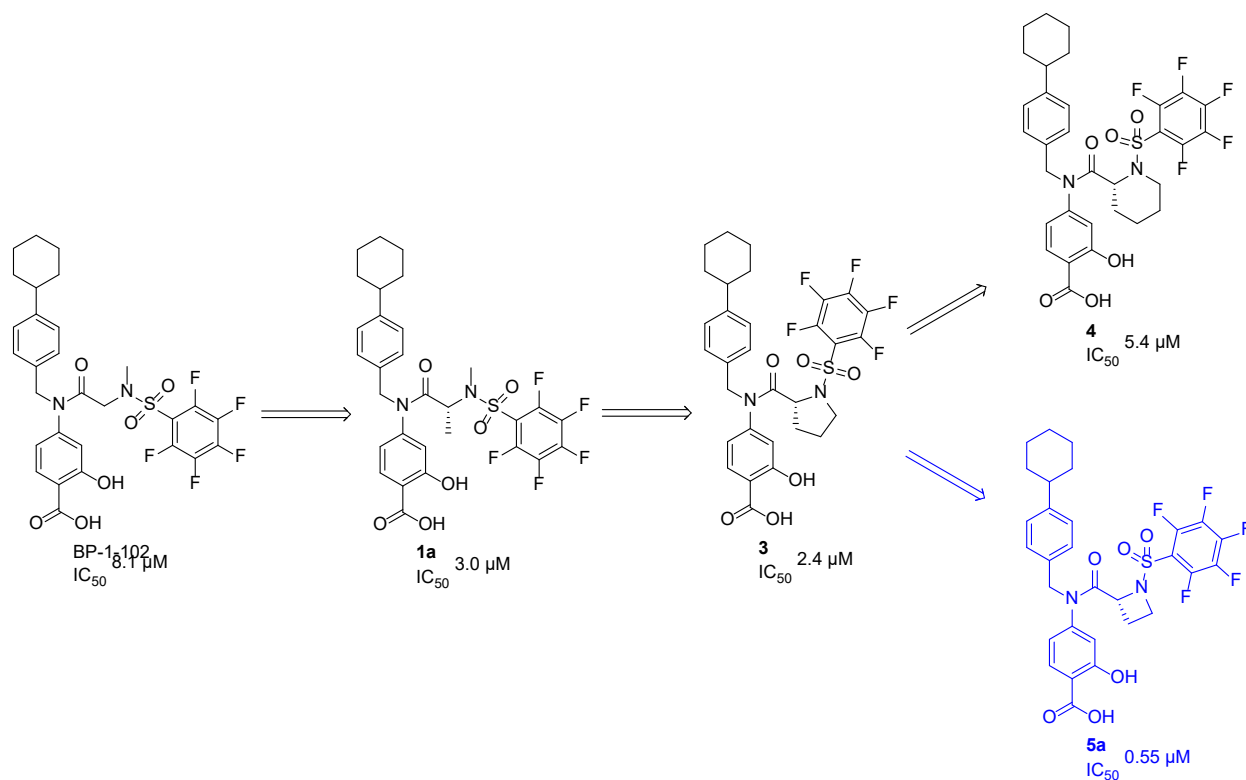

**Fig. S3. Progression to Azetidine Lead Molecule 5a**

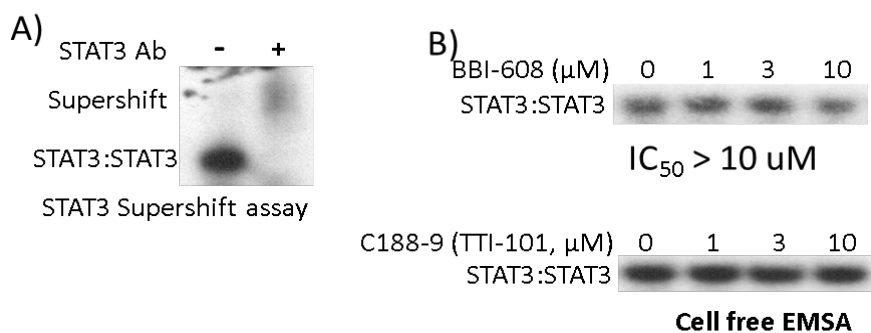

**Fig. S4. STAT3 DNA-binding activity *in vitro*/EMSA with supershift analysis and the effects of C-188-9.** Nuclear extracts from tumor cells of equal total protein containing activated STAT3 were pre-incubated with (A) the anti-STAT3 antibody, C-20, or (B) increasing concentration of compound BBI-608 or C-188-9 prior to incubating with the radiolabeled hSIE probe that binds STAT3 and performing EMSA

analysis; bands corresponding to STAT3:DNA complexes in gel were quantified using ImageJ and represented as percent of control, and plotted against the concentration of compounds, from which IC<sub>50</sub> values were determined. Positions of STAT3:DNA complexes in gel are labeled; control lanes (0) represent nuclear extracts pre-treated with 10% DMSO. Data are representative of 2 independent determinations.

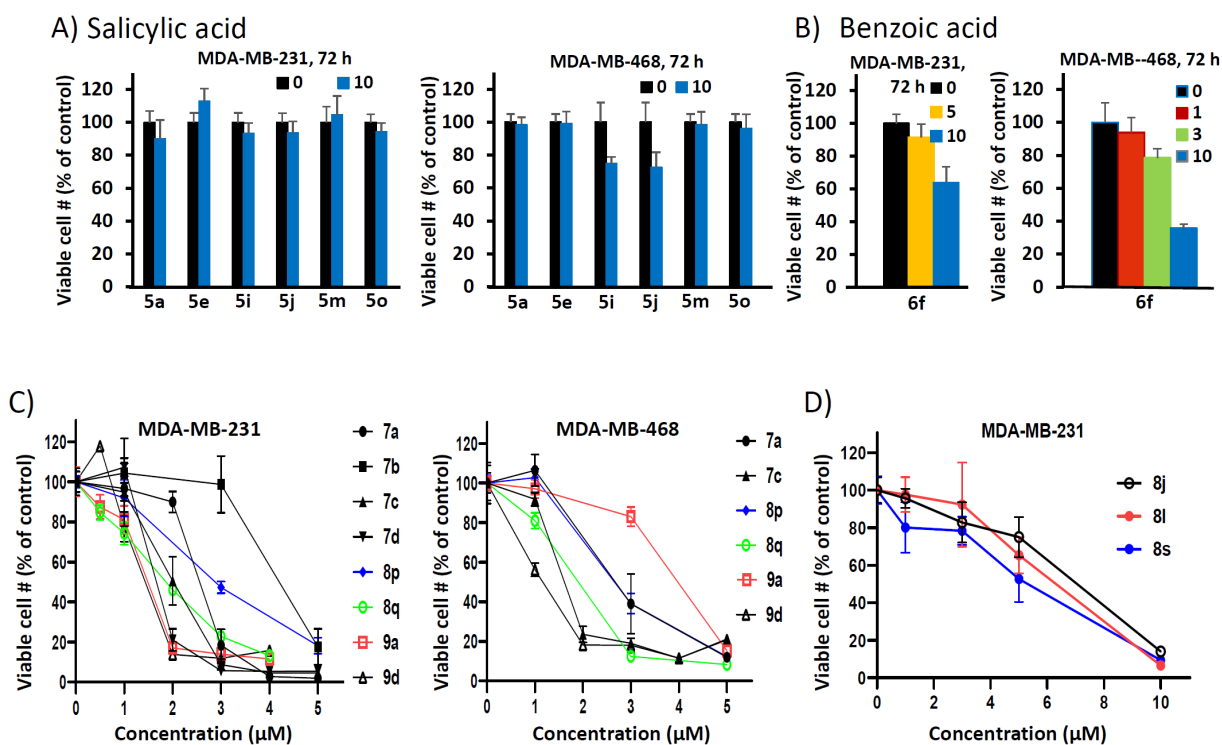

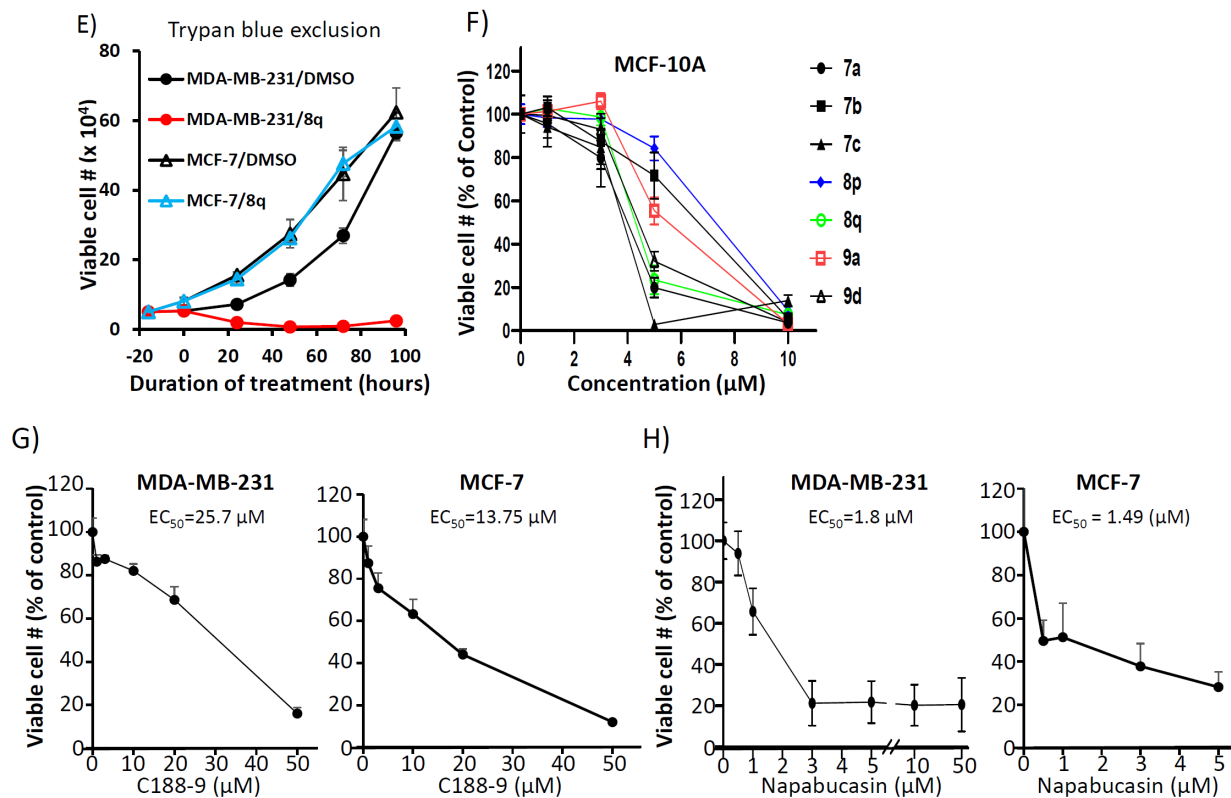

**Fig. S5. *In vitro* cell viability and growth studies for effects of active azetidine analogs.** (A-D, F) Human breast cancer MDA-MB-231 and MDA-MB-468 cells harboring aberrantly-active STAT3, and the normal breast epithelial MCF-10A cells that do not and growing in 96-well culture were treated once with 0-10 μM of the indicated compounds. Cells were harvested after 72 h and subjected to CyQuant cell proliferation assay for the number of viable cells, which are plotted as % number of viable cells against concentration from which EC<sub>50</sub> values were derived; (E) MDA-MB-231 and MCF-7 cells growing in 6-well culture were treated with 2 μM **8q** and at every 24 h, cells were harvested and the viable cells were counted by trypan blue exclusion/phase-contrast microscopy and plotted against treatment duration; and (G, H) human breast cancer MDA-MB-231 or MCF-7 cells were treated with 0-50 μM C188-9 or 0-20 μM napabucasin (BBI-608) for 72 h and subjected to CyQuant assay for viable cells, which are plotted as % number of viable cells against concentration from which EC<sub>50</sub> values were derived. Values are mean ± SEM of two-three studies each in three replicates.

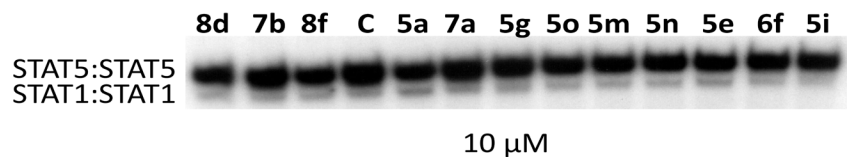

**Fig. S6. Effect of new analogs on STAT1 or STAT5 DNA-binding activity *in vitro*.** Nuclear extracts of equal total protein prepared from epidermal growth factor–stimulated NIH3T3/EGFR fibroblasts containing activated STAT1 and STAT5 were pre-incubated with 10 μM of the designated compounds for 30 min at room temperature prior to incubating with the radiolabeled MGFe probe that binds STAT1 and STAT5 and performing EMSA analysis. Positions of STAT:DNA complexes in gel are labeled; control lanes (C) represents nuclear extract pre-treated with 10% DMSO. Data are representative of 2 independent determinations.

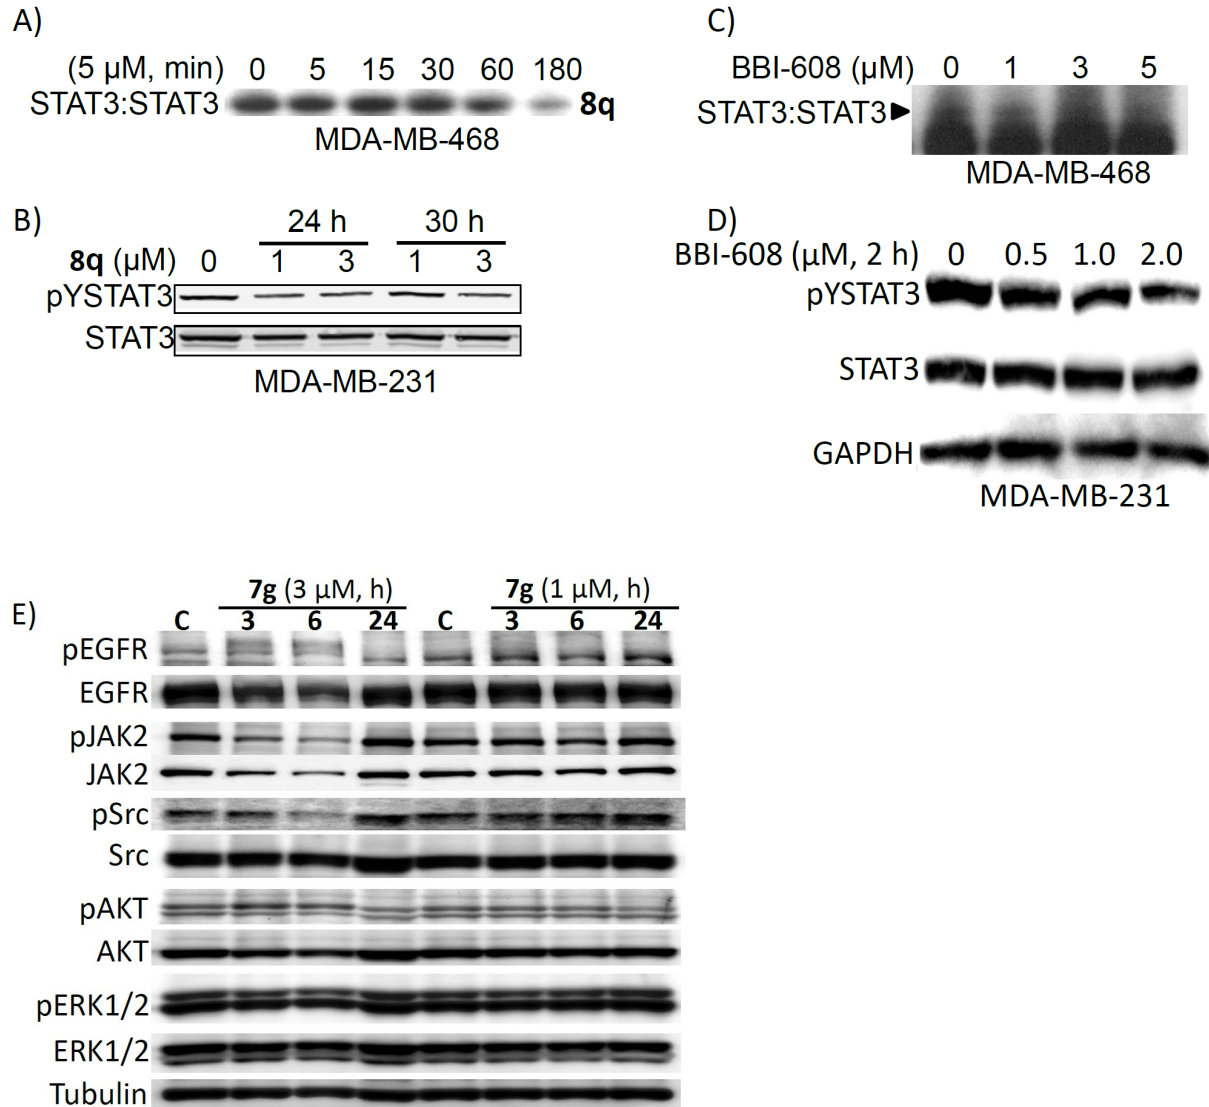

**Fig. S7. Inhibition of constitutive STAT3 phosphorylation and DNA-binding activity tumor cells.**

Human breast cancer cells were treated with different concentrations of the designated compounds for different times and analyzed for STAT3 activation. (A, C) Nuclear extracts of equal total protein prepared from MDA-MB-468 cells untreated (DMSO, 0) or treated with (A) 5  $\mu\text{M}$  **8q** for 1-3 h or (C) 1-5  $\mu\text{M}$  BBI-608 for 3 h were incubated with the hSIE probe that binds STAT3 and subjected to EMSA analysis for STAT3 DNA-binding activity; and (B, D, E) Immunoblotting analysis of whole-cell lysates of equal total protein prepared from MDA-MB-231 cells untreated (DMSO, 0) or (B) treated with 1 or 3  $\mu\text{M}$  of **8q** for 24 or 30 h, (D) 0.5-2  $\mu\text{M}$  BBI-608 for 2 h, or (E) 1 or 3  $\mu\text{M}$  **7g** for 3-24 h probing for pY705STAT3, STAT3, S13

pEGFR, EGFR, pSrc, Src, pJAK2, JAK2, pAKT, AKT, pERK1/2, ERK1/2, GAPDH, or Tubulin. Positions of STAT3:DNA complex or proteins in gel are shown; control (0) lane represents whole-cell lysates or nuclear extracts prepared from 0.05% DMSO-treated cells. Data are representative of 2 independent determinations.

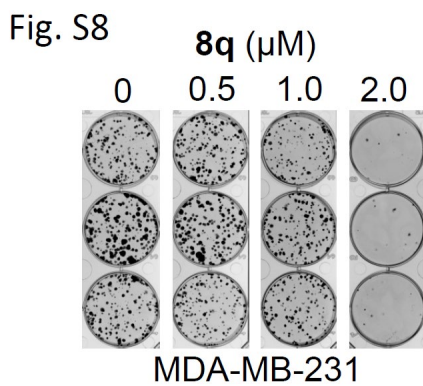

**Fig. S8. Colony survival assay and the effects of STAT3 inhibitor.** Human breast cancer MDA-MB-231 cells were seeded as single-cell culture and treated once with 0-2  $\mu\text{M}$  **8q** and allowed to culture until large colonies were visible, which were stained with crystal violet and imaged. Data are representative of 2 independent determinations.

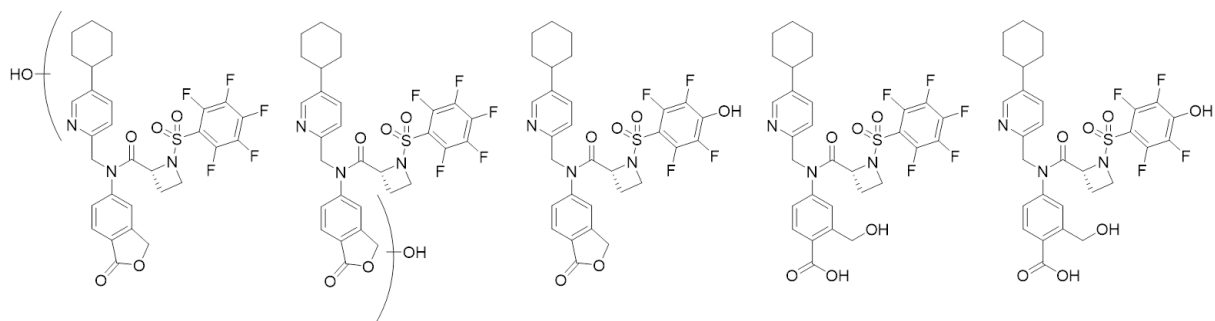

**Fig. S9. Human HLM MetID study of 7g.** Structures of additional metabolites apart from the parent compound.

**Table S1. EMSA IC<sub>50</sub> and cell viability EC<sub>50</sub> values for select esters and heterocyclics.**

|           | EMSA | MDA-MB-231 | MDA-MB-468 | MCF-10A | MCF-7 |
|-----------|------|------------|------------|---------|-------|
| <b>7a</b> | >4   | 2.5        | 2.7        | 7.0     | >1.0  |
| <b>7b</b> | >4   | 4.4        | n.d        | 6.0     | nd    |
| <b>7c</b> | 1.1  | 2.1        | 1.7        | 3.6     | 3.5   |
| <b>7d</b> | 1.0  | 1.8        | nd         | nd      | 4.0   |
| <b>8p</b> | 0.7  | 2.8        | 2.6        | 6.7     | 4.6   |
| <b>8q</b> | 0.8  | 1.7        | 1.6        | 4.5     | 3.8   |
| <b>9a</b> | 1.9  | 1.4        | 3.8        | 5.0     | 6.2   |
| <b>9d</b> | 1.8  | 1.4        | 1.0        | 4.4     | 4.5   |
| <b>9i</b> | 0.6  | 2.0        | nd         | nd      | nd    |
| <b>9j</b> | 1.1  | 2.0        | nd         | nd      | nd    |

nd, not determined

**Table S2. Aqueous Solubility of Selected Compounds.**

| <b>Compound</b>  | <b>SGF<sup>1</sup> (µg/mL)</b> | <b>SIF<sup>2</sup> (µg/mL)</b> |
|------------------|--------------------------------|--------------------------------|
| <b><u>7g</u></b> | <b>116</b>                     | <b>200</b>                     |
| <b><u>8p</u></b> | <b>107</b>                     | <b>117</b>                     |
| <b><u>8q</u></b> | <b>115</b>                     | <b>131</b>                     |
| <b><u>9f</u></b> | <b>104</b>                     | <b>123</b>                     |

Notes: 1. SGF: Simulated Gastric Fluid. 2. SIF: Simulated Intestinal Fluid

*Corresponding Authors Information:*

\*Address correspondence to:

James Turkson, Professor, Department of Medicine, Division of Oncology, Cedars Sinai Medical Center, 8700 Beverly Blvd, Davis 5019, Los Angeles, CA, 90048, Tel. 310-423-6887; Email: [james.turkson@cshs.org](mailto:james.turkson@cshs.org)

\*Francisco Lopez-Tapia, Medicinal Chemistry Leader, Department of Chemistry, University of Hawaii, Manoa, 2545 McCarthy Mall, Honolulu, HI, USA 96822-2275; Email: [francisco.lopez@cshs.org](mailto:francisco.lopez@cshs.org)

Author Contributions: §CB-P and PY contributed equally.

Conflicts of interest: JT is a co-founder of Novella, LLC, which has licensed STAT3 IP. The remaining authors have no competing interests.

*Acknowledgement:* We thank all colleagues and members of our laboratory for the stimulating discussions. This work was supported by NIH/NCI R01 CA208851 (JT), LEIDOS Biomedical Research/NCI Contract 19X122Q (JT), and Cedars-Sinai Start-up funds (JT).



*Abbreviations:* STAT, signal transducer and activator of transcription; EMSA, electrophoretic mobility shift assay; PARP, poly (ADP-ribose) polymerase; VEGF, Vascular endothelial growth factor; GAPDH, glyceraldehyde 3-phosphate dehydrogenase.

## References

1. Lopez-Tapia, F.; Brotherton-Pleiss, C.; Yue, P.; Murakami, H.; Costa Araujo, A. C.; Reis Dos Santos, B.; Ichinotsubo, E.; Rabkin, A.; Shah, R.; Lantz, M.; Chen, S.; Tius, M. A.; Turkson, J., Linker Variation and Structure-Activity Relationship Analyses of Carboxylic Acid-based Small Molecule STAT3 Inhibitors. *ACS Med Chem Lett* **2018**, *9*, 250-255.
2. Lopez-Tapia, F.; Brotherton-Pleiss, C.; Yue, P.; Murakami, H.; Costa Araujo, A. C.; Reis dos Santos, B.; Ichinotsubo, E.; Rabkin, A.; Shah, R.; Lantz, M.; Chen, S.; Tius, M. A.; Turkson, J., Linker variation and structure-activity relationship analyses of car-boxylic acid-based small molecule STAT3 inhibitors. *ACS Med Chem Lett* **2018**, *9*, 250-255.
3. Nicolaou, K. C.; Estrada, A. A.; Zak, M.; Lee, S. H.; Safina, B. S., A Mild and Selective Method for the Hydrolysis of Esters with Trimethyltin Hydroxide. *Angewandte Chemie International Edition* **2005**, *44*, 1378-1382.

# Compound 5a

## Qualitative Analysis Report

**Data Filename** CBP-5-106r.d      **Sample Name** CBP-5-106 final  
**Sample Type** Sample      **Position** Vial 43  
**Instrument Name** Instrument 1      **User Name**  
**Acq Method** ESI+20-100%\_12min.m      **Acquired Time** 2/18/2016 2:38:01 PM

**IRM Calibration Status** Not Applicable      **DA Method** 102315.m

**Comment**

### User Chromatograms

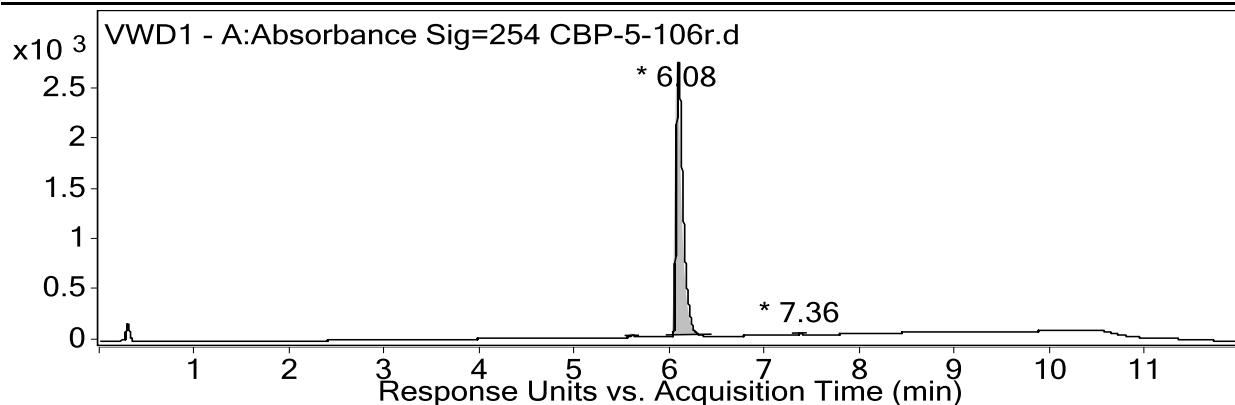

### Integration Peak List

| Peak | Start | RT   | End  | Height  | Area     | Area % |
|------|-------|------|------|---------|----------|--------|
| 1    | 5.53  | 5.6  | 5.68 | 18.98   | 66.92    | 0.49   |
| 2    | 5.96  | 6.08 | 6.45 | 2718.45 | 13654.53 | 100    |
| 3    | 7.29  | 7.36 | 7.45 | 10.28   | 33.68    | 0.25   |

**Fragmentor Voltage** 165      **Collision Energy** 0      **Ionization Mode** ESI

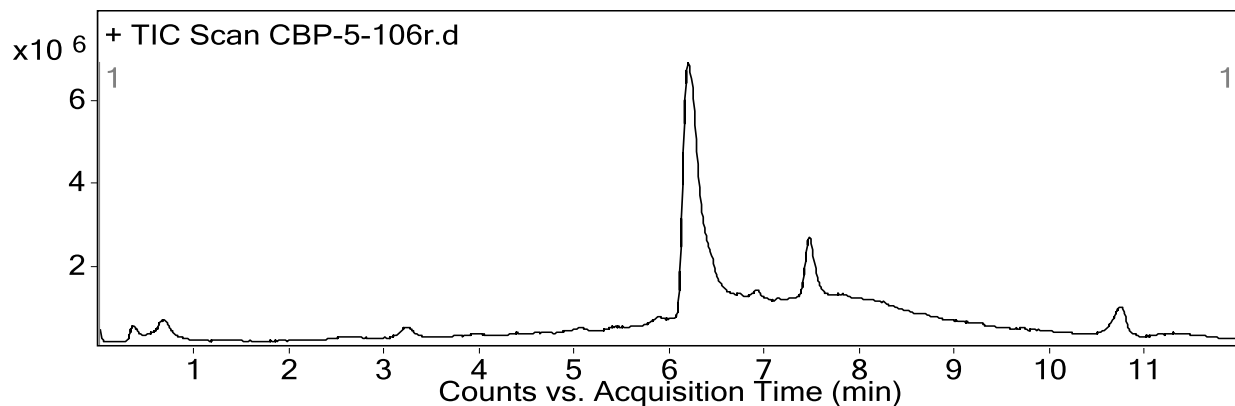

### User Spectra

**Fragmentor Voltage** 165      **Collision Energy** 0      **Ionization Mode** Esi

# Qualitative Analysis Report

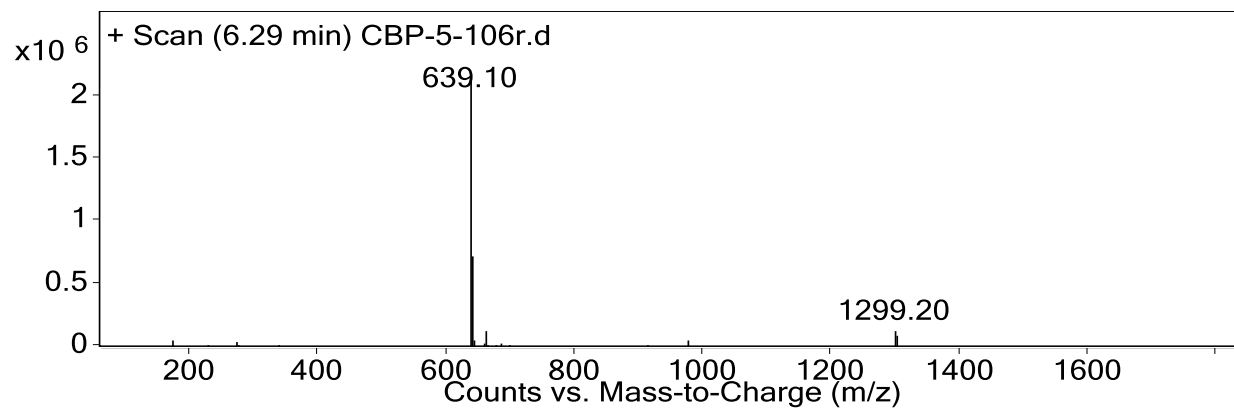

## Peak List

| <i>m/z</i> | <i>z</i> | Abund   |
|------------|----------|---------|
| 639.1      | 1        | 2148623 |
| 640.2      | 1        | 713149  |
| 641.1      | 1        | 236849  |
| 661.1      |          | 118830  |
| 1299.2     |          | 129054  |

--- End Of Report ---

# Compound 5o

## Qualitative Analysis Report

**Data Filename** F8-53r2.d      **Sample Name** F8-53 final  
**Sample Type** Sample      **Position** Vial 31  
**Instrument Name** Instrument 1      **User Name**  
**Acq Method** ESI+20-100%\_12min.m      **Acquired Time** 10/27/2016 4:03:18 PM  
**IRM Calibration Status** Not Applicable      **DA Method** ChromPeakSurvey-Default.m

### Comment

### User Chromatograms

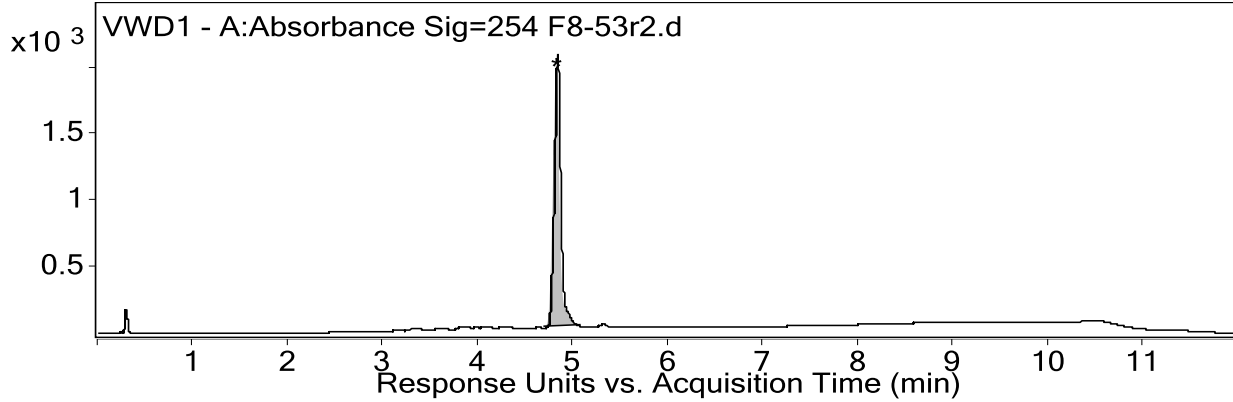

### Integration Peak List

| Peak | Start | RT   | End  | Height  | Area    | Area % |
|------|-------|------|------|---------|---------|--------|
| 1    | 4.7   | 4.83 | 5.09 | 2062.62 | 9941.13 | 100    |

**Fragmentor Voltage** 165      **Collision Energy** 0      **Ionization Mode** ESI

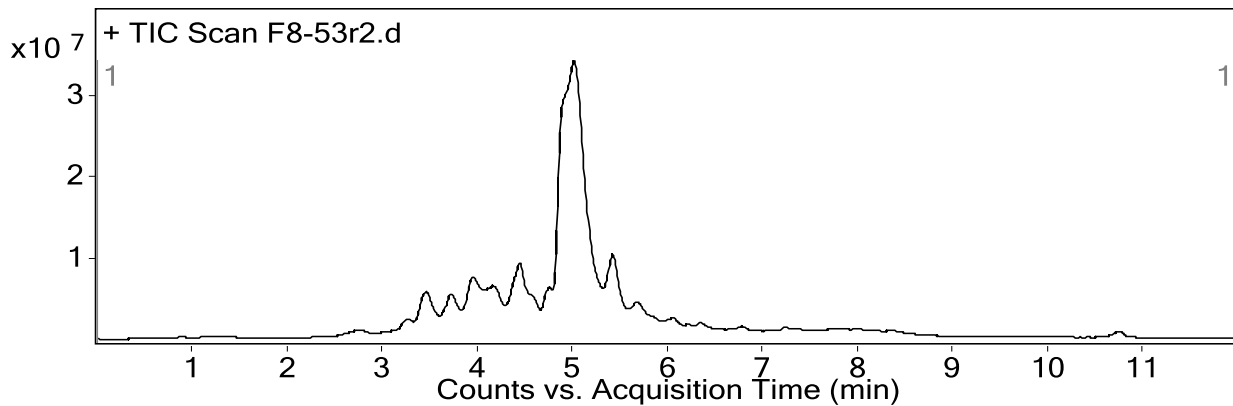

### User Spectra

**Fragmentor Voltage** 165      **Collision Energy** 0      **Ionization Mode** Esi

# Qualitative Analysis Report

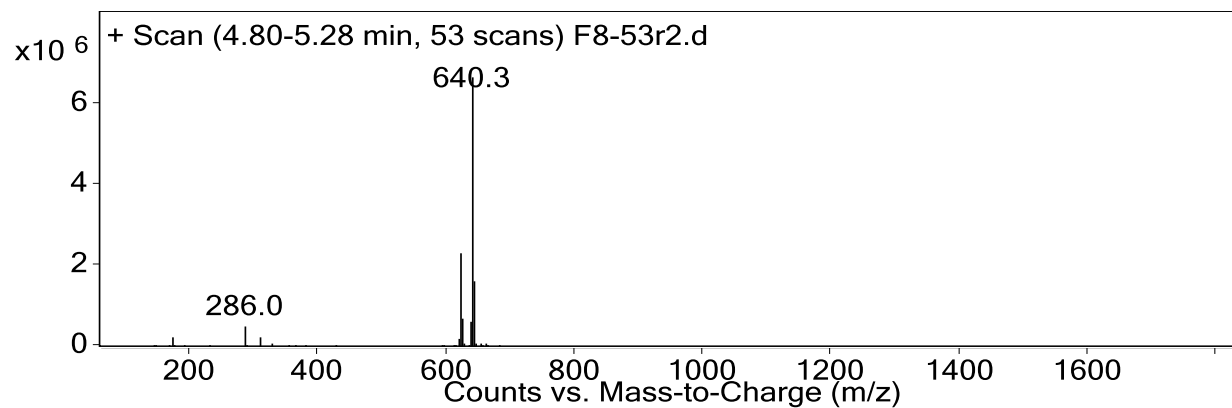

## Peak List

| <i>m/z</i> | <i>z</i> | Abund   |
|------------|----------|---------|
| 286        |          | 485073  |
| 622.1      | 1        | 2326993 |
| 623.2      | 1        | 679020  |
| 638.1      |          | 628643  |
| 640.3      | 1        | 6667776 |
| 641.2      | 1        | 4494485 |
| 642.2      | 1        | 1626888 |

--- End Of Report ---

# Compound 7e

## Qualitative Analysis Report

**Data Filename** KN0315.d      **Sample Name** KN0315-1  
**Sample Type** Sample      **Position** Vial 32  
**Instrument Name** Instrument 1      **User Name**  
**Acq Method** ESI+20-100%\_12min.m      **Acquired Time** 6/2/2017 12:35:50 PM  
**IRM Calibration Status** Not Applicable      **DA Method** ChromPeakSurvey-Default.m

### Comment

### User Chromatograms

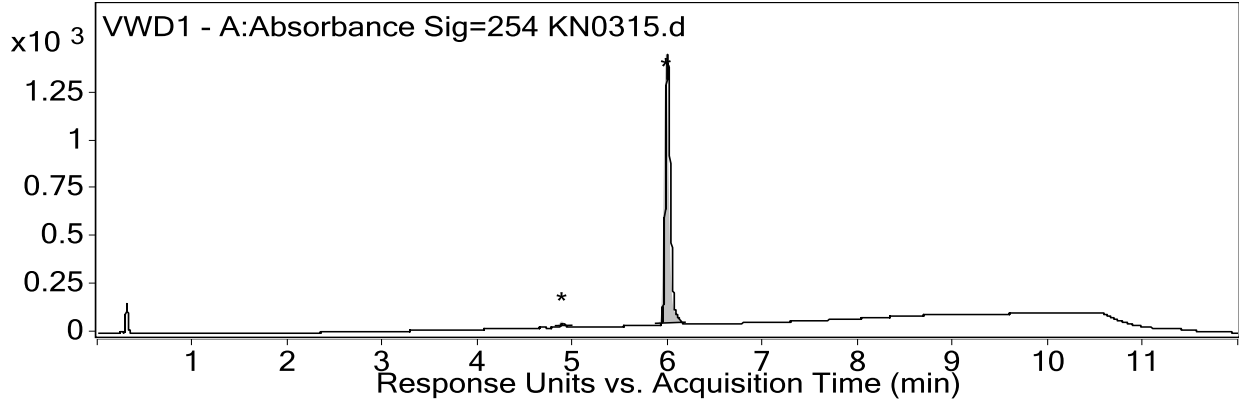

### Integration Peak List

| Peak | Start | RT   | End | Height  | Area    | Area % |
|------|-------|------|-----|---------|---------|--------|
| 1    | 4.82  | 4.89 | 5   | 20.66   | 72.41   | 1.37   |
| 2    | 5.87  | 5.99 | 6.2 | 1409.56 | 5271.02 | 100    |

**Fragmentor Voltage** 165      **Collision Energy** 0      **Ionization Mode** ESI

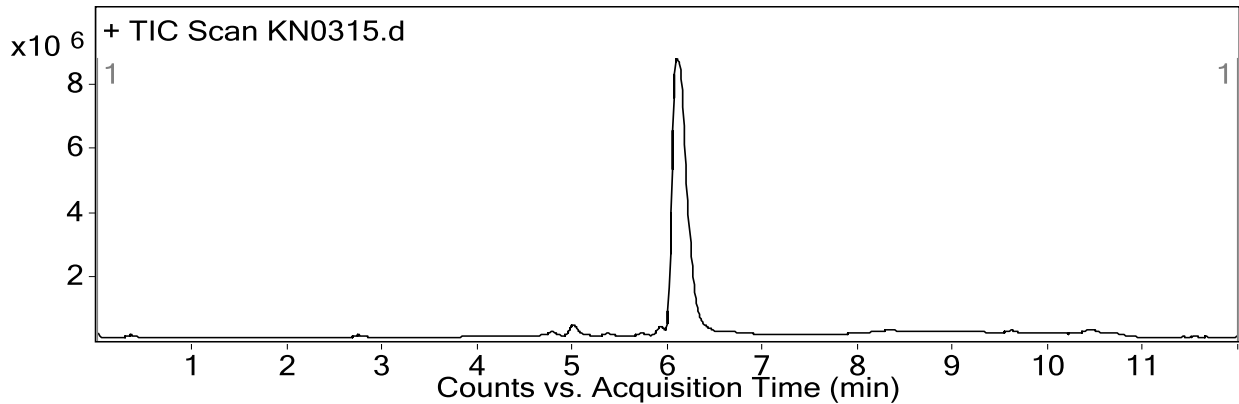

### User Spectra

**Fragmentor Voltage** 165      **Collision Energy** 0      **Ionization Mode** ESI

# Qualitative Analysis Report

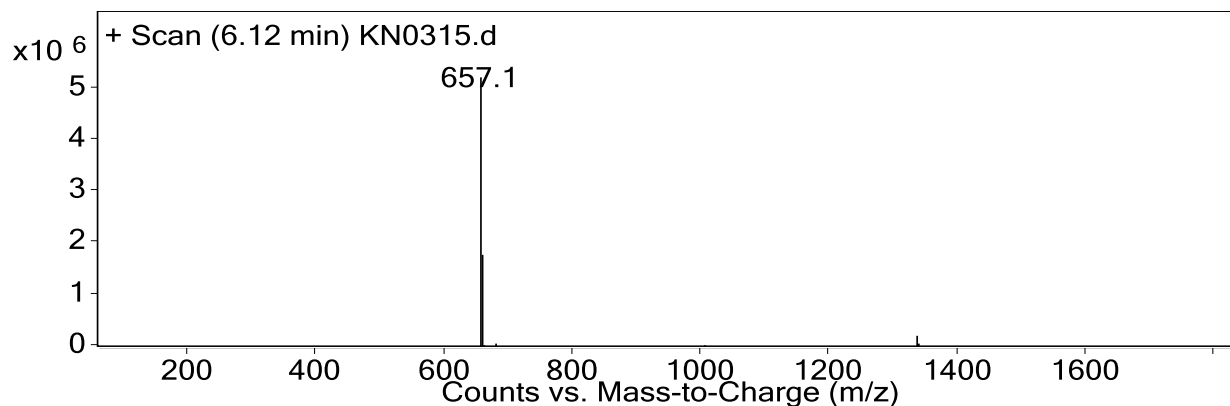

## Peak List

| m/z   | z | Abund   |
|-------|---|---------|
| 657.1 | 1 | 5208514 |
| 658   | 1 | 1777412 |
| 659.1 | 1 | 533623  |

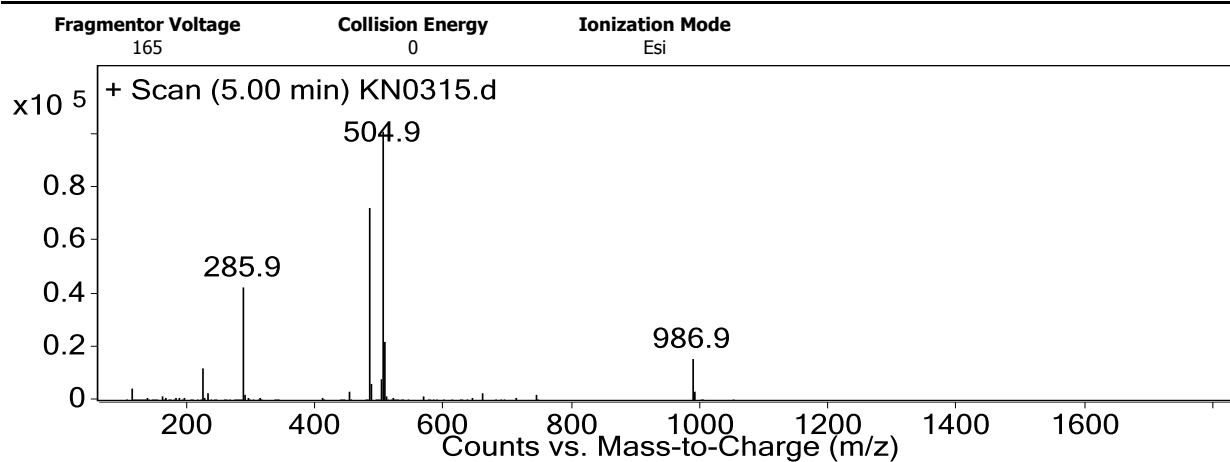

## Peak List

| m/z   | z | Abund  |
|-------|---|--------|
| 223.9 |   | 12022  |
| 285.9 |   | 42870  |
| 482.9 | 1 | 72229  |
| 484   | 1 | 15691  |
| 502   |   | 8362   |
| 504.9 | 1 | 101257 |
| 505.9 | 1 | 22249  |
| 506.9 | 1 | 7429   |
| 986.9 | 1 | 15750  |
| 987.9 | 1 | 6478   |

--- End Of Report ---

# Compound 7f

## Qualitative Analysis Report

**Data Filename** KN0286-1.d      **Sample Name** KN0286-1  
**Sample Type** Sample      **Position** Vial 41  
**Instrument Name** Instrument 1      **User Name**  
**Acq Method** ESI+20-100%\_12min.m      **Acquired Time** 5/16/2017 2:32:17 PM  
**IRM Calibration Status** Not Applicable      **DA Method** ChromPeakSurvey-Default.m

### Comment

### User Chromatograms

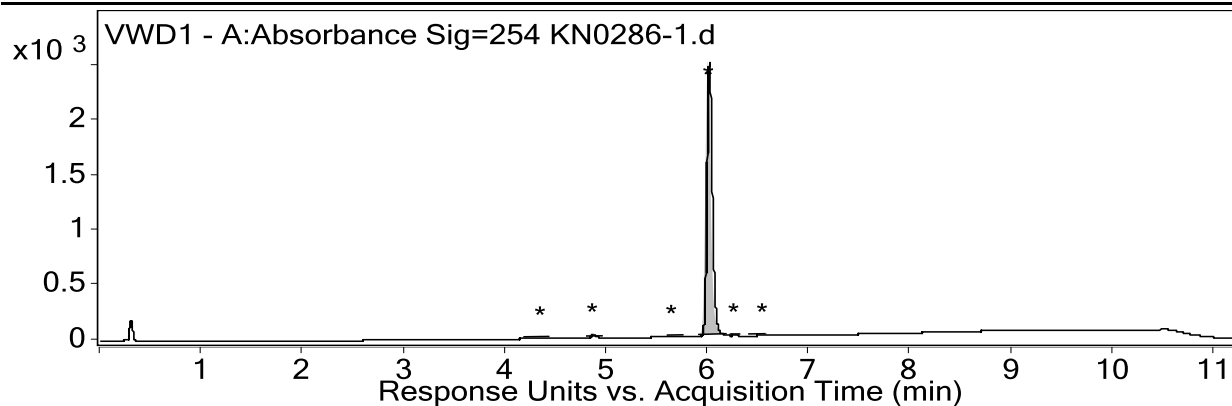

### Integration Peak List

| Peak | Start | RT   | End  | Height  | Area    | Area % |
|------|-------|------|------|---------|---------|--------|
| 1    | 4.19  | 4.35 | 4.45 | 6.47    | 32.87   | 0.36   |
| 2    | 4.81  | 4.87 | 4.97 | 27.8    | 99.57   | 1.08   |
| 3    | 5.61  | 5.65 | 5.77 | 2.7     | 11.34   | 0.12   |
| 4    | 5.92  | 6.01 | 6.2  | 2488.03 | 9229.93 | 100    |
| 5    | 6.23  | 6.27 | 6.33 | 4.38    | 14.57   | 0.16   |
| 6    | 6.41  | 6.55 | 6.59 | 1.1     | 5.94    | 0.06   |

**Fragmentor Voltage** 165      **Collision Energy** 0      **Ionization Mode** ESI

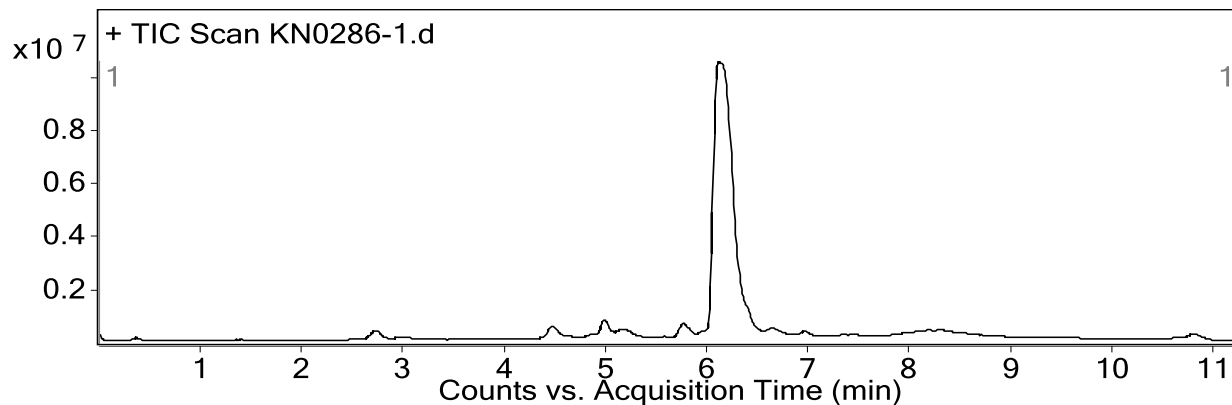

### User Spectra

**Fragmentor Voltage** 165      **Collision Energy** 0      **Ionization Mode** ESI



# Qualitative Analysis Report

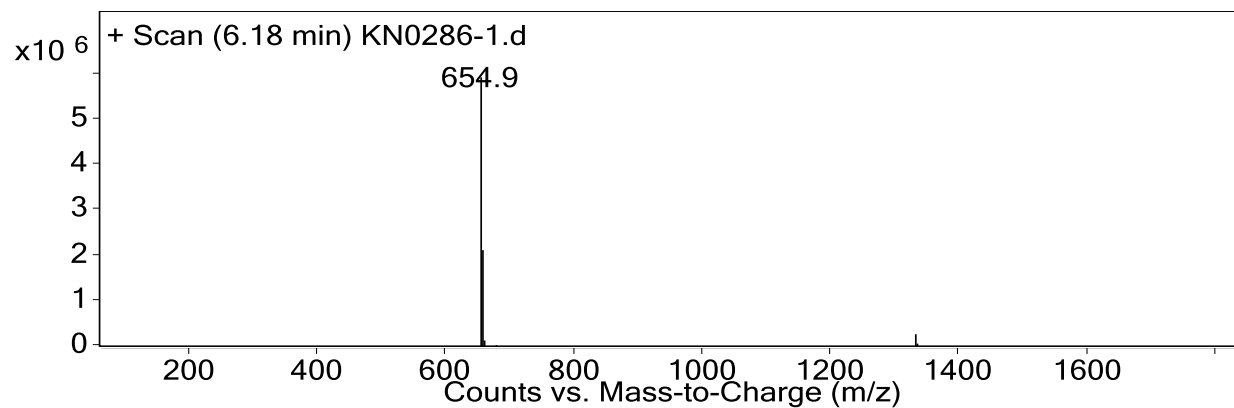

## Peak List

| <i>m/z</i> | <i>z</i> | Abund   |
|------------|----------|---------|
| 654.9      | 1        | 5934357 |
| 655.9      | 1        | 2107982 |
| 656.9      | 1        | 658473  |

--- End Of Report ---

## Qualitative Analysis Report

|                               |                    |                      |                      |
|-------------------------------|--------------------|----------------------|----------------------|
| <b>Data Filename</b>          | W1-P22r.d          | <b>Sample Name</b>   | W1-P22               |
| <b>Sample Type</b>            | Sample             | <b>Position</b>      | P1-E3                |
| <b>Instrument Name</b>        | Instrument 1       | <b>User Name</b>     |                      |
| <b>Acq Method</b>             | 40_90_fo_rpurity.m | <b>Acquired Time</b> | 7/12/2017 3:44:14 PM |
| <b>IRM Calibration Status</b> | Success            | <b>DA Method</b>     | Default.m            |
| <b>Comment</b>                |                    |                      |                      |

|                     |      |                       |                             |
|---------------------|------|-----------------------|-----------------------------|
| <b>Sample Group</b> |      | <b>Info.</b>          |                             |
| <b>Stream Name</b>  | LC 1 | <b>Acquisition SW</b> | 6200 series TOF/6500 series |
|                     |      | <b>Version</b>        | Q-TOF B.06.01 (B6157)       |

### User Chromatograms

**Fragmentor Voltage** 175    **Collision Energy** 0    **Ionization Mode** ESI

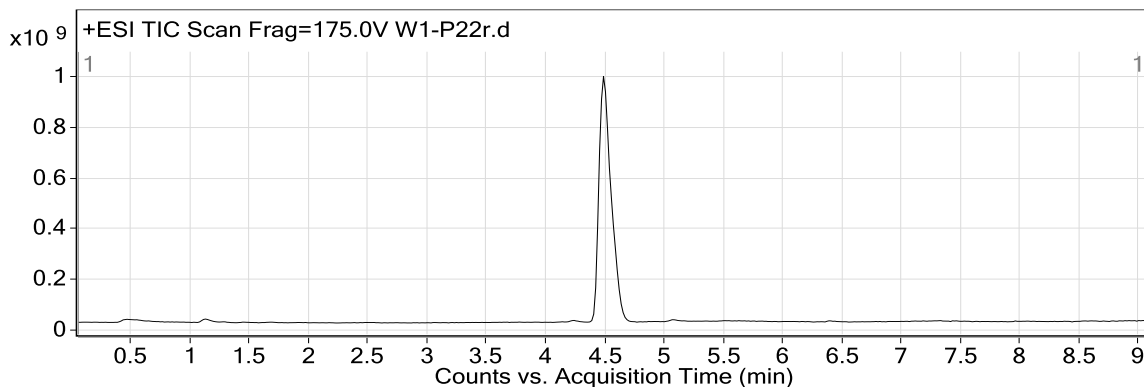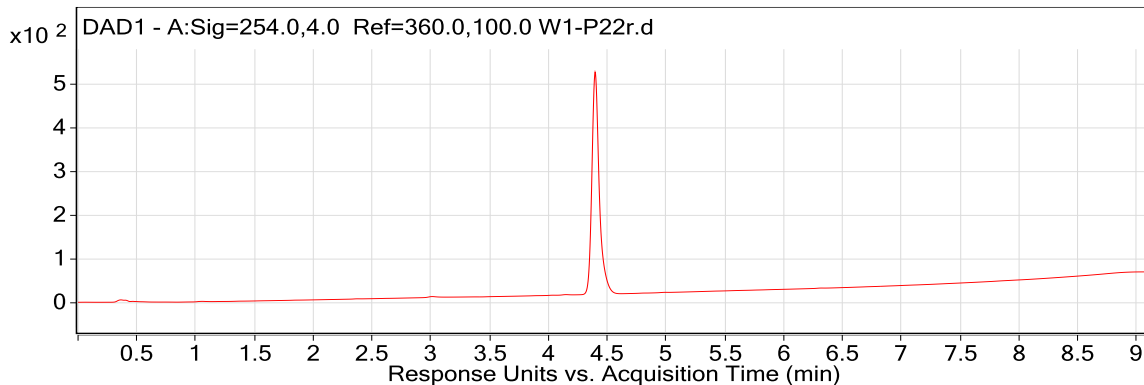

### User Spectra

**Fragmentor Voltage** 175    **Collision Energy** 0    **Ionization Mode** ESI

# Qualitative Analysis Report

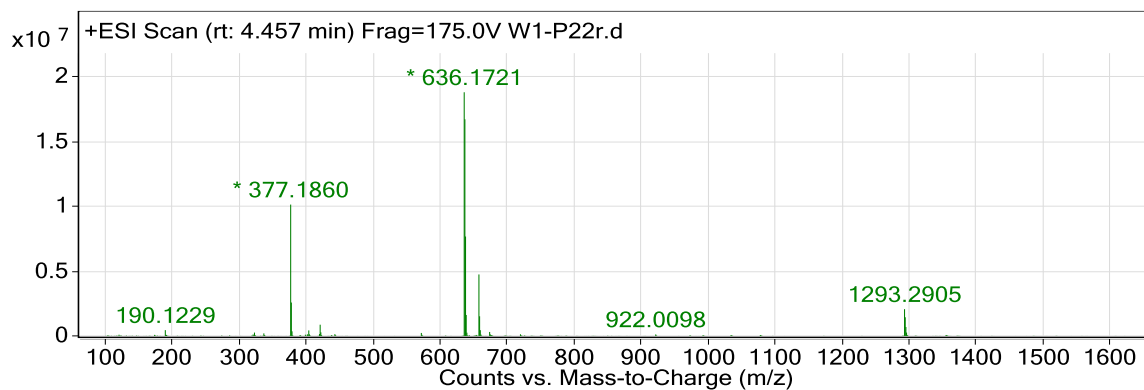

## Peak List

| <b>m/z</b> | <b>z</b> | <b>Abund</b> |
|------------|----------|--------------|
| 377.186    | 1        | 10151458     |
| 378.1885   | 1        | 2578313.5    |
| 636.1721   |          | 18834186     |
| 637.1651   | 1        | 16744369     |
| 638.1614   | 1        | 7681100.5    |
| 639.1613   | 1        | 1616957.38   |
| 658.1398   | 1        | 4749792      |
| 659.143    | 1        | 1516258.38   |
| 1293.2905  | 1        | 2065600.88   |
| 1294.2934  | 1        | 1440491      |

--- End Of Report ---

## Qualitative Analysis Report

**Data Filename** F8-150.d      **Sample Name** F8-150  
**Sample Type** Sample      **Position** Vial 2  
**Instrument Name** Instrument 1      **User Name**  
**Acq Method** ESI+20-100%\_12min.m      **Acquired Time** 4/28/2017 4:03:42 PM  
**IRM Calibration Status** Not Applicable      **DA Method** ChromPeakSurvey-Default.m

### Comment

### User Chromatograms

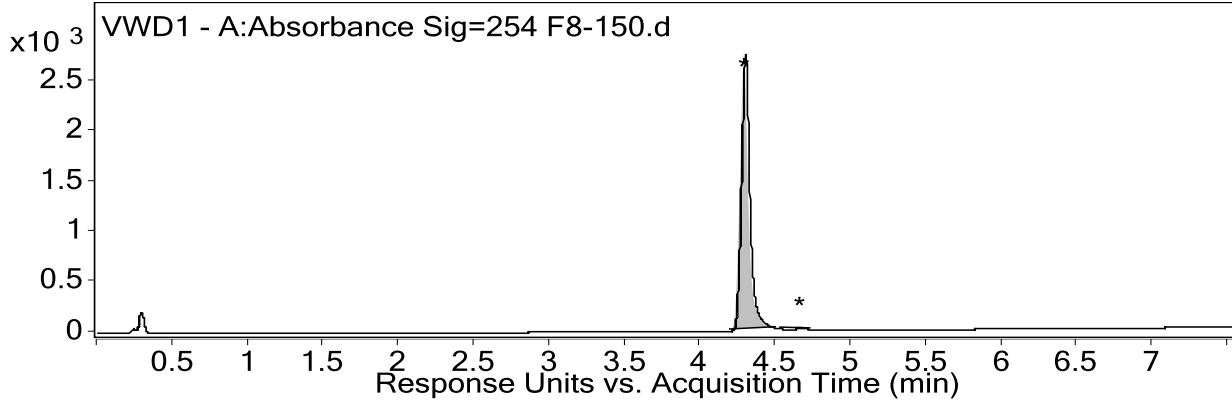

### Integration Peak List

| Peak | Start | RT   | End  | Height  | Area     | Area % |
|------|-------|------|------|---------|----------|--------|
| 1    | 4.2   | 4.3  | 4.51 | 2731.45 | 10790.87 | 100    |
| 2    | 4.53  | 4.66 | 4.74 | 17.57   | 40.2     | 0.37   |

**Fragmentor Voltage** 165      **Collision Energy** 0      **Ionization Mode** ESI

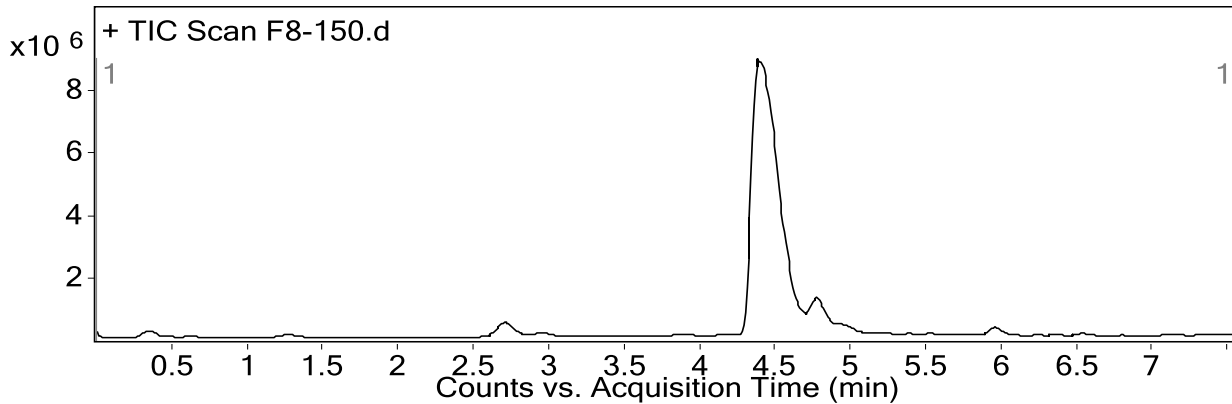

### User Spectra

**Fragmentor Voltage** 165      **Collision Energy** 0      **Ionization Mode** Esi

# Qualitative Analysis Report

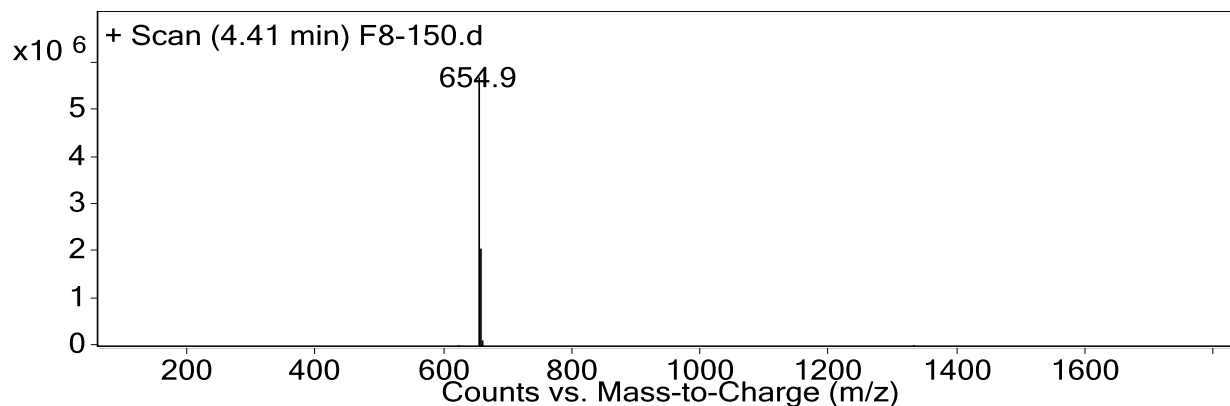

## Peak List

| m/z   | z | Abund   |
|-------|---|---------|
| 654.9 | 1 | 5718987 |
| 655.9 | 1 | 2063765 |
| 656.9 | 1 | 644758  |

Fragmentor Voltage 165 Collision Energy 0 Ionization Mode Esi

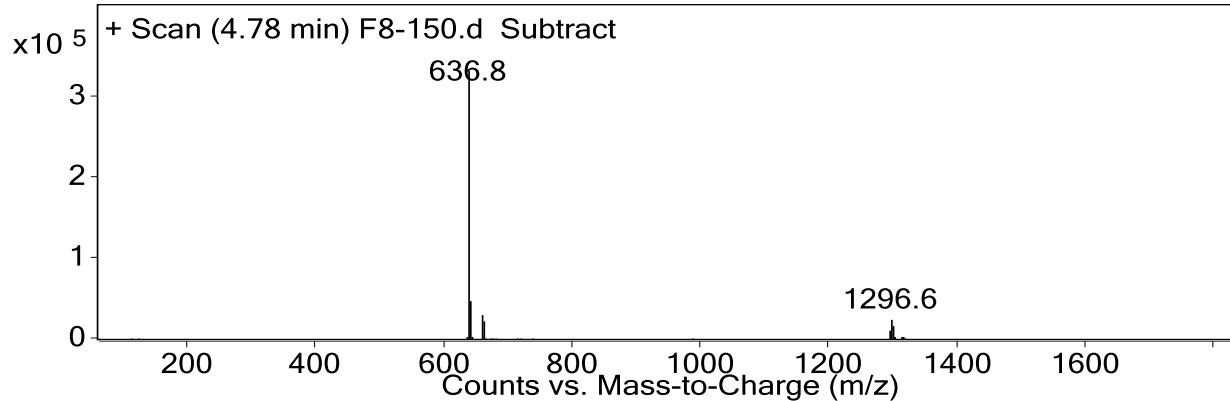

## Peak List

| m/z    | z | Abund  |
|--------|---|--------|
| 636.8  | 1 | 334151 |
| 637.9  | 1 | 107533 |
| 638.9  | 1 | 151934 |
| 639.9  | 1 | 47706  |
| 658.8  |   | 31781  |
| 660.9  |   | 23787  |
| 1296.6 |   | 25878  |
| 1298.6 |   | 17953  |

--- End Of Report ---

## Qualitative Analysis Report

|                               |                    |                      |                       |
|-------------------------------|--------------------|----------------------|-----------------------|
| <b>Data Filename</b>          | F8-191r.d          | <b>Sample Name</b>   | F8-191                |
| <b>Sample Type</b>            | Sample             | <b>Position</b>      | P1-E2                 |
| <b>Instrument Name</b>        | Instrument 1       | <b>User Name</b>     |                       |
| <b>Acq Method</b>             | 40_90_fo_rpurity.m | <b>Acquired Time</b> | 7/27/2017 11:51:24 AM |
| <b>IRM Calibration Status</b> | Success            | <b>DA Method</b>     | Default.m             |
| <b>Comment</b>                |                    |                      |                       |

|                     |      |                       |                             |
|---------------------|------|-----------------------|-----------------------------|
| <b>Sample Group</b> |      | <b>Info.</b>          |                             |
| <b>Stream Name</b>  | LC 1 | <b>Acquisition SW</b> | 6200 series TOF/6500 series |
|                     |      | <b>Version</b>        | Q-TOF B.06.01 (B6157)       |

### User Chromatograms

**Fragmentor Voltage** 175    **Collision Energy** 0    **Ionization Mode** ESI

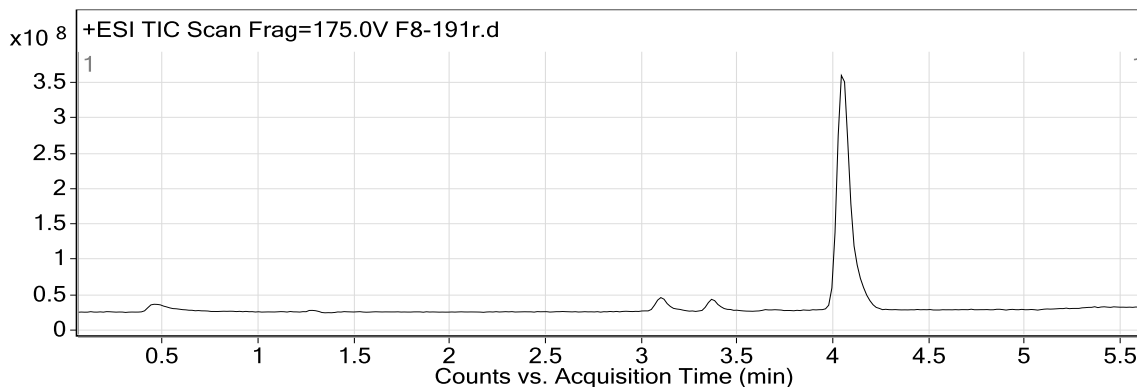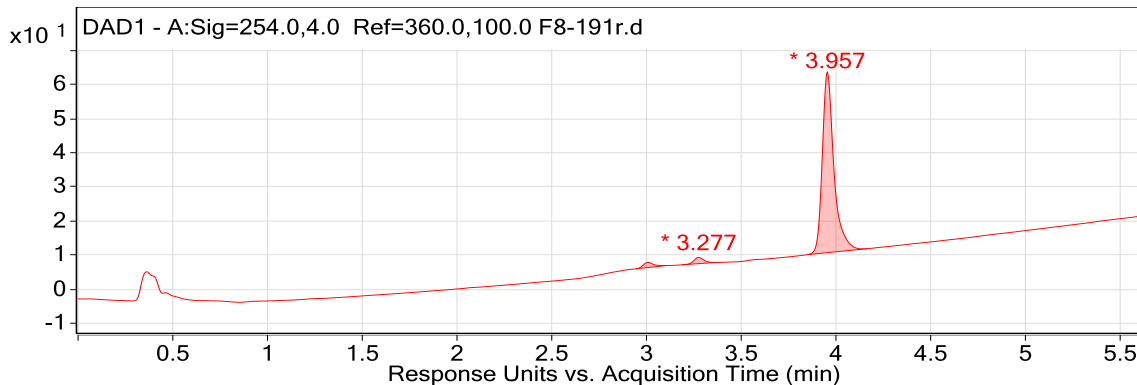

### Integration Peak List

| Peak | Start | RT    | End   | Height | Area   | Area % |
|------|-------|-------|-------|--------|--------|--------|
| 1    | 2.947 | 3.01  | 3.107 | 1.5    | 5.8    | 2.56   |
| 2    | 3.19  | 3.277 | 3.367 | 1.82   | 6.71   | 2.97   |
| 3    | 3.85  | 3.957 | 4.167 | 52.91  | 225.96 | 100    |

### User Spectra

**Fragmentor Voltage** 175    **Collision Energy** 0    **Ionization Mode** ESI

# Qualitative Analysis Report

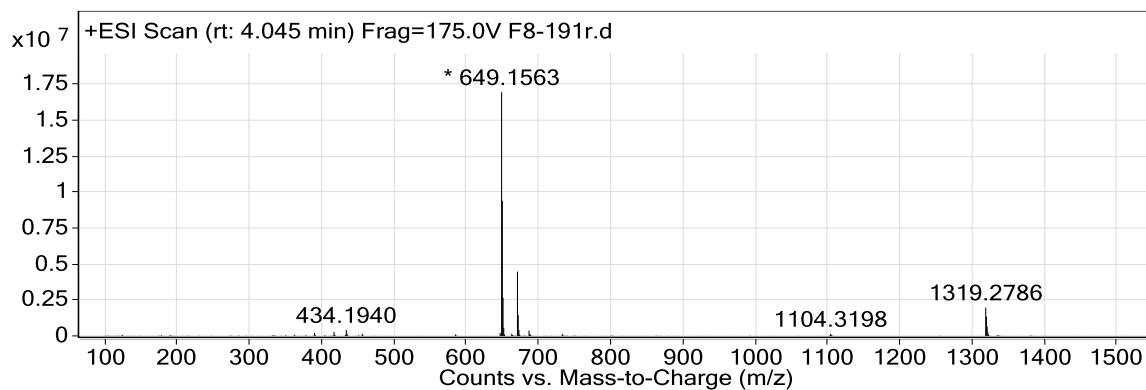

## Peak List

| <i>m/z</i> | <i>z</i> | Abund      |
|------------|----------|------------|
| 649.1563   | 1        | 16941758   |
| 650.1557   | 1        | 9394780    |
| 651.1547   | 1        | 2651068    |
| 652.1563   | 1        | 562220.06  |
| 671.1338   | 1        | 4467956.5  |
| 672.1368   | 1        | 1442381.25 |
| 673.1373   | 1        | 409655.94  |
| 1319.2786  | 1        | 1970475.13 |
| 1320.282   | 1        | 1342992.63 |
| 1321.2843  | 1        | 635530.19  |

--- End Of Report ---

| Compound | SMILES                                                                                                                | EMSA IC50 (μM) |
|----------|-----------------------------------------------------------------------------------------------------------------------|----------------|
| 1        | <chem>OC(C1=CC=C(N(C([C@@H](C)N(C)S(C2=C(F)C(F)=C(F)C(F)=C2F)(=O)=O)=O)CC3=CC=C(C4CCCC4)C=C3)C(F)=C1)=O</chem>        | 1.80 ± 0.94    |
| 2        | <chem>OC(C1=C(O)C=C(N(C([C@@H]2N(S(C3=C(F)C(F)=C(F)C(F)=C3F)(=O)=O)CC2)=O)CC4=CC=C(C5CCCC5)C=C4)C=C1)=O</chem>        | 7.2±3.4        |
| 3        | <chem>OC(C1=C(O)C=C(N(C([C@@H]2CCCN2S(C3=C(F)C(F)=C(F)C(F)=C3F)(=O)=O)=O)CC4=CC=C(C5CCCC5)C=C4)C=C1)=O</chem>         | 2.4±0.4        |
| 4        | <chem>OC(C1=C(O)C=C(N(C([C@@H]2N(S(C3=C(F)C(F)=C(F)C(F)=C3F)(=O)=O)CC2)=O)CC4=CC=C(C5CCCC5)C=C4)C=C1)=O</chem>        | 5.4±1.6        |
| 5a       | <chem>OC(C1=C(O)C=C(N(C([C@@H](CC2)N2S(C3=C(F)C(F)=C(F)C(F)=C3F)(=O)=O)=O)CC4=CC=C(C5CCCC5)C=C4)C=C1)=O</chem>        | 0.55±0.01      |
| 5b       | <chem>OC(C1=C(O)C=C(N(C([C@@H](CC2)N2S(C3=C(F)C(F)=C(F)C(F)=C3F)(=O)=O)=O)CC4=CC=C(C5CCCC5)C=C4)C=C1)=O</chem>        | 2.22±0.49      |
| 5c       | <chem>OC(C1=C(O)C=C(N(C(C2CN(S(C3=C(F)C(F)=C(F)C(F)=C3F)(=O)=O)C2)=O)CC4=CC=C(C5CCCC5)C=C4)C=C1)=O</chem>             | >>2            |
| 5d       | <chem>O=C(O[Na])C1=C(O)C=C(N(C([C@@H](CC2)N2S(C3=C(F)C(F)=C(F)C(F)=C3F)(=O)=O)=O)CC4=CC=C(C5CCCC5)C=C4)C=C1</chem>    | 0.58±0.06      |
| 5e       | <chem>OC(C1=C(O)C=C(N(C([C@@H](CC2)N2S(C3=C(F)C(F)=C(F)C(F)=C3F)(=O)=O)=O)CC4=CC=C(C5CCCC5)C=C4)C=C1)=O</chem>        | 0.71±0.11      |
| 5f       | <chem>OC(C1=C(O)C=C(N(C([C@@H](CC2)N2S(C3=C(F)C(F)=C(F)C(F)=C3F)(=O)=O)=O)CC4=CC=C(C(C)(C)C)C=C4)C=C1)=O</chem>       | 2.17± 0.30     |
| 5g       | <chem>OC(C1=C(O)C=C(N(C([C@@H](CC2)N2S(C3=C(F)C(F)=C(F)C(F)=C3F)(=O)=O)=O)CC4=CC=C(C5CCOCC5)C=C4)C=C1)=O</chem>       | 1.09±0.13      |
| 5h       | <chem>OC(C1=C(O)C=C(N(C([C@@H](CC2)N2S(C3=C(F)C(F)=C(F)C(F)=C3F)(=O)=O)=O)CC4=CC=C(C5CCOCC5)C=C4)C=C1)=O</chem>       | 1.50±0.01      |
| 5i       | <chem>OC(C1=C(O)C=C(N(C([C@@H](CC2)N2S(C3=C(F)C(F)=C(F)C(F)=C3F)(=O)=O)=O)CC4=CC=C(C5CCCC5)C=C4)C(F)=C1)=O</chem>     | 0.66±0.07      |
| 5j       | <chem>O=C(O[Na])C1=C(O)C=C(N(C([C@@H](CC2)N2S(C3=C(F)C(F)=C(F)C(F)=C3F)(=O)=O)=O)CC4=CC=C(C5CCCC5)C=C4)C(F)=C1</chem> | 0.56±0.07      |
| 5k       | <chem>OC(C1=C(O)C=C(N(C([C@@H](CC2)N2S(C3=C(F)C(F)=C(F)C(F)=C3F)(=O)=O)=O)CC4=CC=C(C(C)C)C=C4)C(F)=C1)=O</chem>       | 1.28±0.16      |
| 5l       | <chem>OC(C1=C(O)C=C(N(C([C@@H](CC2)N2S(C3=C(F)C(F)=C(F)C(F)=C3F)(=O)=O)=O)CC4=CC=C(C5CCOCC5)C=C4)C(F)=C1)=O</chem>    | 0.81±0.16      |
| 5m       | <chem>OC(C1=C(O)C=C(N(C([C@@H](CC2)N2S(C3=C(F)C(F)=C(F)C(F)=C3F)(=O)=O)=O)CC4=CC=C(C5CCCC5)N=C4)C=C1)=O</chem>        | 0.66±0.16      |
| 5n       | <chem>OC(C1=C(O)C=C(N(C([C@@H](CC2)N2S(C3=C(F)C(F)=C(F)C(F)=C3F)(=O)=O)=O)CC4=CN=C(C5CCOCC5)C=C4)C=C1)=O</chem>       | 0.90±0.14      |
| 5o       | <chem>OC(C1=C(O)C=C(N(C([C@@H](CC2)N2S(C3=C(F)C(F)=C(F)C(F)=C3F)(=O)=O)=O)CC4=CC=C(C5CCCC5)C=N4)C=C1)=O</chem>        | 0.38±0.02      |
| 5p       | <chem>OC(C1=C(O)C=C(N(C([C@@H](CC2)N2S(C3=C(F)C(F)=C(F)C(F)=C3F)(=O)=O)=O)CC4=CN=C(C5CCCC5)C=N4)C=C1)=O</chem>        | 0.46±0.05      |
| 5q       | <chem>OC(C1=C(O)C=C(N(C([C@@H](CC2)N2S(C3=C(F)C(F)=C(F)C(F)=C3F)(=O)=O)=O)CC4=NC=C(C5CCCC5)C=N4)C=C1)=O</chem>        | 0.46±0.05      |
| 5r       | <chem>OC(C1=C(O)C=C(N(C([C@@H](CC2)N2S(C3=C(F)C(F)=C(F)C(F)=C3F)(=O)=O)=O)CC4=CC=C(C5CCCC5)N=N4)C=C1)=O</chem>        | 0.70±0.03      |
| 5s       | <chem>OC(C1=C(O)C=C(N(C([C@@H](CC2)N2S(C3=C(F)C(F)=C(F)C(F)=C3F)(=O)=O)=O)CC4=CC=C(C5CCCC5)C=N4)C=C1)=O</chem>        | 0.63±0.07      |
| 5t       | <chem>O=C(O)C1=C(O)C=C(N(C([C@@H](CC2)N2S(C3=C(F)C(F)=C(F)C(F)=C3F)(=O)=O)=O)CC4=CN=C(C5CCCC5)C=N4)C=C1</chem>        | 0.78±0.06      |
| 6a       | <chem>OC(C1=CC=C(N(C([C@@H](CC2)N2S(C3=C(F)C(F)=C(F)C(F)=C3F)(=O)=O)=O)CC4=CC=C(C5CCCC5)C=C4)C=C1)=O</chem>           | 3.04±0.14      |
| 6b       | <chem>OC(C1=CC=C(N(C([C@@H](CC2)N2S(C3=C(F)C(F)=C(F)C(F)=C3F)(=O)=O)=O)CC4=CC=C(C5CCOCC5)C=C4)C=C1)=O</chem>          | 3.94±0.43      |
| 6c       | <chem>O=C(O)C1=CC=C(N(C([C@@H](CC2)N2S(C3=C(F)C(F)=C(F)C(F)=C3F)(=O)=O)=O)CC4=CC=C(C5CCCC5)C=N4)C=C1</chem>           | 1.09 ± 0.30    |
| 6d       | <chem>O=C([C@@H](CC1)N1S(C2=C(F)C(F)=C(F)C(F)=C2F)(=O)=O)N(CC3=CC=C(C4CCCC4)C=C3)C5=NC(C(O)=O)=CO5</chem>             | > 5            |
| 6e       | <chem>O=C([C@@H](CC1)N1S(C2=C(F)C(F)=C(F)C(F)=C2F)(=O)=O)N(CC3=CC=C(C4CCCC4)C=C3)C5=CC=C(C6=NN=NN6)C=C5</chem>        | 1.36±0.10      |
| 6f       | <chem>OC(C1=CC=C(N(C([C@@H](CC2)N2S(C3=C(F)C(F)=C(F)C(F)=C3F)(=O)=O)=O)CC4=CC=C(C5CCCC5)C=C4)C(F)=C1)=O</chem>        | 1.08±0.20      |
| 6g       | <chem>OC(C1=CC=C(N(C([C@@H](CC2)N2S(C3=C(F)C(F)=C(F)C(F)=C3F)(=O)=O)=O)CC4=CC=C(C(C)(C)C)C=C4)C(F)=C1)=O</chem>       | 3.55±0.10      |
| 6h       | <chem>OC(C1=CC=C(N(C([C@@H](CC2)N2S(C3=C(F)C(F)=C(F)C(F)=C3F)(=O)=O)=O)CC4=CC=C(C5CCCC5)C=N4)C(F)=C1)=O</chem>        | 0.76±0.11      |
| 6i       | <chem>OC(C1=CC=C(N(C([C@@H](CC2)N2S(C3=C(F)C(F)=C(F)C(F)=C3F)(=O)=O)=O)CC4=CC=C(C5CCCC5)C=N4)C=C1F)=O</chem>          | 0.86±0.11      |
| 6j       | <chem>O=C(O)C1=CC=C(N(C([C@@H](CC2)N2S(C3=C(F)C(F)=C(F)C(F)=C3F)(=O)=O)=O)CC4=CC=C(C5CCCC5)C=N4)C(F)=C1</chem>        | 1.18±0.19      |
| 6k       | <chem>OC(C1=NC=C(N(C([C@@H](CC2)N2S(C3=C(F)C(F)=C(F)C(F)=C3F)(=O)=O)=O)CC4=CC=C(C5CCCC5)C=N4)C=C1)=O</chem>           | > 2            |
| 6l       | <chem>O=C(O)C1=CC=C(N(C([C@@H](CC2)N2S(C3=C(F)C(F)=C(F)C(F)=C3F)(=O)=O)=O)CC4=CN=C(C5CCCC5)C=N4)C(F)=C1</chem>        | 1.72±0.04      |



|    |                                                                                                         |              |
|----|---------------------------------------------------------------------------------------------------------|--------------|
| 7a | O=C(OC)C1=C(O)C=C(N(C([C@@H](CC2)N2S(C3=C(F)C(F)=C(F)C(F)=C3F)(=O)=O)=O)CC4=CC=C(C5CCCCC5)C=C4)C=C1     | > 4          |
| 7b | O=C(OC)C1=CC=C(N(C([C@@H](CC2)N2S(C3=C(F)C(F)=C(F)C(F)=C3F)(=O)=O)=O)CC4=CC=C(C5CCCCC5)C=C4)C(F)=C1     | > 4          |
| 7c | O=C(OC)C1=C(O)C=C(N(C([C@@H](CC2)N2S(C3=C(F)C(F)=C(F)C(F)=C3F)(=O)=O)=O)CC4=CC=C(C5CCCCC5)N=C4)C=C1     | 1.05         |
| 7d | O=C(OC)C1=C(O)C=C(N(C([C@@H](CC2)N2S(C3=C(F)C(F)=C(F)C(F)=C3F)(=O)=O)=O)CC4=CC=C(C5CCCCC5)C=N4)C=C1     | 0.99         |
| 7e | O=C(OC)C1=CC=C(N(C([C@@H](CC2)N2S(C3=C(F)C(F)=C(F)C(F)=C3F)(=O)=O)=O)CC4=CN=C(C5CCCCC5)C=N4)C(F)=C1     | > 10         |
| 7f | O=C(OC)C1=C(O)C=C(N(C([C@@H](CC2)N2S(C3=C(F)C(F)=C(F)C(F)=C3F)(=O)=O)=O)CC4=CN=C(C5CCCCC5)C=N4)C=C1     | 7.4          |
| 7g | O=C([C@@H](CC1)N1S(C2=C(F)C(F)=C(F)C(F)=C2F)(=O)=O)N(CC3=CC=C(C4CCCCC4)C=N3)C5=CC6=C(C(OC6)=O)C=C5      | 1.79         |
| 8a | O=C(NO)C1=CC=C(N(C([C@@H](CC2)N2S(C3=C(F)C(F)=C(F)C(F)=C3F)(=O)=O)=O)CC4=CC=C(C5CCCCC5)C=C4)C=C1        | 2.51±0.23    |
| 8b | O=C(NO)C1=CC=C(N(C([C@@H](CC2)N2S(C3=C(F)C(F)=C(F)C(F)=C3F)(=O)=O)=O)CC4=CC=C(C5CCCCC5)C=C4)C=C1        | 2.25±0.72    |
| 8c | O=C(NO)C1=CC=C(N(C([C@@H](CC2)N2S(C3=C(F)C(F)=C(F)C(F)=C3F)(=O)=O)=O)CC4=CC=C(C5CCOCC5)C=C4)C=C1        | 2.92±0.60    |
| 8d | O=C(NO)C1=C(O)C=C(N(C([C@@H](CC2)N2S(C3=C(F)C(F)=C(F)C(F)=C3F)(=O)=O)=O)CC4=CC=C(C5CCCCC5)C=C4)C=C1     | 1.32± 0.36   |
| 8e | O=C(NO)C1=C(O)C=C(N(C([C@@H](CC2)N2S(C3=C(F)C(F)=C(F)C(F)=C3F)(=O)=O)=O)CC4=CC=C(C5CCOCC5)C=C4)C=C1     | 2.07±0.115   |
| 8f | O=C(NO)C1=CC=C(N(C([C@@H](CC2)N2S(C3=C(F)C(F)=C(F)C(F)=C3F)(=O)=O)=O)CC4=CC=C(C5CCCCC5)C=C4)C(F)=C1     | 1.75±0.19    |
| 8g | O=C(NO)C1=CC=C(N(C([C@@H](CC2)N2S(C3=C(F)C(F)=C(F)C(F)=C3F)(=O)=O)=O)CC4=CC=C(C(C)(C)C)C=C4)C(F)=C1     | 3.96± 0.06   |
| 8h | O=C(NO)C1=C(O)C=C(N(C([C@@H](CC2)N2S(C3=C(F)C(F)=C(F)C(F)=C3F)(=O)=O)=O)CC4=CC=C(C5CCOCC5)C=C4)C(F)=C1  | 2.11±0.24    |
| 8i | O=C(NO)C1=C(O)C=C(N(C([C@@H](CC2)N2S(C3=C(F)C(F)=C(F)C(F)=C3F)(=O)=O)=O)CC4=CC=C(C5CCCCC5)C=N4)C=C1     | 0.34±0.02    |
| 8j | O=C(NOC)C1=C(O)C=C(N(C([C@@H](CC2)N2S(C3=C(F)C(F)=C(F)C(F)=C3F)(=O)=O)=O)CC4=CC=C(C5CCCCC5)C=N4)C=C1    | 0.51±0.02    |
| 8k | O=C(NOC)C1=CC=C(N(C([C@@H](CC2)N2S(C3=C(F)C(F)=C(F)C(F)=C3F)(=O)=O)=O)CC4=CC=C(C5CCCCC5)C=N4)C(F)=C1    | 1.96±0.15    |
| 8l | O=C(NO)C1=CC=C(N(C([C@@H](CC2)N2S(C3=C(F)C(F)=C(F)C(F)=C3F)(=O)=O)=O)CC4=CC=C(C5CCCCC5)C=N4)C(F)=C1     | 0.89±0.18    |
| 8m | O=C(NO)C1=CC=C(N(C([C@@H](CC2)N2S(C3=C(F)C(F)=C(F)C(F)=C3F)(=O)=O)=O)CC4=CC=C(C5CCCCC5)C=N4)C(F)=C1     | 1.94±0.16    |
| 8n | NC(C1=CC=C(N(C([C@@H](CC2)N2S(C3=C(F)C(F)=C(F)C(F)=C3F)(=O)=O)=O)CC4=CC=C(C5CCCCC5)C=N4)C(F)=C1)=O      | > 2          |
| 8o | O=C(NC)C1=CC=C(N(C([C@@H](CC2)N2S(C3=C(F)C(F)=C(F)C(F)=C3F)(=O)=O)=O)CC4=CC=C(C5CCCCC5)C=N4)C(F)=C1     | 1.91±0.03    |
| 8p | O=C([C@@H](CC1)N1S(C2=C(F)C(F)=C(F)C(F)=C2F)(=O)=O)N(CC3=CC=C(C4CCCCC4)C=N3)C5=CC(O)=C(C(N)=O)C=C5      | 0.66±0.17    |
| 8q | O=C([C@@H](CC1)N1S(C2=C(F)C(F)=C(F)C(F)=C2F)(=O)=O)N(CC3=CC=C(C4CCCCC4)C=N3)C5=CC(O)=C(C(NC)=O)C=C5     | 0.77±0.15    |
| 8r | O=C(N(C)C)C1=C(O)C=C(N(C([C@@H](CC2)N2S(C3=C(F)C(F)=C(F)C(F)=C3F)(=O)=O)=O)CC4=CC=C(C5CCCCC5)C=N4)C=C1  | 1.72±0.21    |
| 8s | O=C(NO)C1=C(O)C=C(N(C([C@@H](CC2)N2S(C3=C(F)C(F)=C(F)C(F)=C3F)(=O)=O)=O)CC4=CN=C(C5CCCCC5)C=N4)C=C1     | 0.53±0.05    |
| 8t | O=C(NO)C1=CC=C(N(C([C@@H](CC2)N2S(C3=C(F)C(F)=C(F)C(F)=C3F)(=O)=O)=O)CC4=CN=C(C5CCCCC5)C=N4)C(F)=C1     | > 2          |
| 8u | O=C([C@@H](CC1)N1S(C2=C(F)C(F)=C(F)C(F)=C2F)(=O)=O)N(CC3=CN=C(C4CCCCC4)C=N3)C5=CC(O)=C(C(NC)=O)C=C5     | 1.90±0.02    |
| 9a | O=C([C@@H](CC1)N1S(C2=C(F)C(F)=C(F)C(F)=C2F)(=O)=O)N(CC3=CC=C(C4CCCCC4)C=C3)C5=CC6=C(C(NC=C6)=O)C=C5    | 1.87±0.17    |
| 9b | O=C([C@@H](CC1)N1S(C2=C(F)C(F)=C(F)C(F)=C2F)(=O)=O)N(CC3=CC=C(C4CCCCC4)C=N3)C5=CC6=C(C(NC=C6)=O)C=C5    | 0.79         |
| 9c | O=C([C@@H](CC1)N1S(C2=C(F)C(F)=C(F)C(F)=C2F)(=O)=O)N(CC3=CC=C(C4CCCCC4)C=N3)C5=CC6=C(C(N(C)C=C6)=O)C=C5 | 0.93         |
| 9d | O=C([C@@H](CC1)N1S(C2=C(F)C(F)=C(F)C(F)=C2F)(=O)=O)N(CC3=CC=C(C4CCCCC4)C=C3)C5=CC6=C(C(NN=C6)=O)C=C5    | 1.80±0.15    |
| 9e | O=C([C@@H](CC1)N1S(C2=C(F)C(F)=C(F)C(F)=C2F)(=O)=O)N(CC3=CN=C(C4CCCCC4)C=N3)C5=CC6=C(C(NN=C6)=O)C=C5    | 2.45±0.02    |
| 9f | O=C([C@@H](CC1)N1S(C2=C(F)C(F)=C(F)C(F)=C2F)(=O)=O)N(CC3=CC=C(C4CCCCC4)C=N3)C5=CC6=C(C(NC=N6)=O)C=C5    | 0.98 ± 0.054 |
| 9g | O=C([C@@H](CC1)N1S(C2=C(F)C(F)=C(F)C(F)=C2F)(=O)=O)N(CC3=CC=C(C4CCCCC4)C=N3)C5=CC6=C(C(N(C)C=N6)=O)C=C5 | 1.12         |
| 9h | O=C([C@@H](CC1)N1S(C2=C(F)C(F)=C(F)C(F)=C2F)(=O)=O)N(CC3=CN=C(C4CCCCC4)C=N3)C5=CC6=C(C(NC=N6)=O)C=C5    | 1.47±0.15    |
| 9i | O=C([C@@H](CC1)N1S(C2=C(F)C(F)=C(F)C(F)=C2F)(=O)=O)N(CC3=CC=C(C4CCCCC4)C=N3)C5=CC6=C(C(NC6)=O)C=C5      | 0.64±0.12    |

|    |                                                                                                                   |           |
|----|-------------------------------------------------------------------------------------------------------------------|-----------|
| 9j | <chem>O=C([C@@H](CC1)N1S(C2=C(F)C(F)=C(F)C(F)=C2F)(=O)=O)N(CC3=CC=C(C4CCCCC4)C=N3)C5=CC6=C(C(NC6)=O)C=C5F</chem>  | 1.09±0.15 |
| 9k | <chem>O=C([C@@H](CC1)N1S(C2=C(F)C(F)=C(F)C(F)=C2F)(=O)=O)N(CC3=CC=C(C4CCCCC4)C=N3)C5=CC6=C(C(NC6=O)=O)C=C5</chem> | 1.18±0.42 |
| 9l | <chem>O=C([C@@H](CC1)N1S(C2=C(F)C(F)=C(F)C(F)=C2F)(=O)=O)N(CC3=CC=C(C4CCCCC4)C=C3)C5=CC6=C(C=NN6)C=C5F</chem>     | 1.90±0.37 |
| 9m | <chem>O=C([C@@H](CC1)N1S(C2=C(F)C(F)=C(F)C(F)=C2F)(=O)=O)N(CC3=CC=C(C4CCCCC4)C=C3)C5=C(F)C6=C(C=NN6)C=C5</chem>   | 2.96±0.12 |
| 9n | <chem>O=C([C@@H](CC1)N1S(C2=C(F)C(F)=C(F)C(F)=C2F)(=O)=O)N(CC3=CC=C(C4CCCCC4)C=N3)C5=CC6=C(C=NN6)C=C5F</chem>     | 1.80±0.09 |
| 9o | <chem>O=C([C@@H](CC1)N1S(C2=C(F)C(F)=C(F)C(F)=C2F)(=O)=O)N(CC3=CN=C(C4CCCCC4)C=N3)C5=CC6=C(C=NN6)C=C5F</chem>     | 1.42±0.10 |
| 9p | <chem>O=C([C@@H](CC1)N1S(C2=C(F)C(F)=C(F)C(F)=C2F)(=O)=O)N(CC3=CC=C(C4CCCCC4)C=C3)C5=CC6=C(N=CN6)C=C5</chem>      | 2.35±0.55 |
| 9q | <chem>O=C([C@@H](CC1)N1S(C2=C(F)C(F)=C(F)C(F)=C2F)(=O)=O)N(CC3=CC=C(C4CCCCC4)C=N3)C5=CC6=C(N=NN6)C=C5</chem>      | 0.61±0.04 |
| 9r | <chem>O=C([C@@H](CC1)N1S(C2=C(F)C(F)=C(F)C(F)=C2F)(=O)=O)N(CC3=CN=C(C4CCCCC4)C=N3)C5=CC6=C(N=NN6)C=C5</chem>      | 0.63±0.01 |
