# Supplementary material
Source: PubMed Central journal article supplement (PMC7816766)
Supplement: jm0c01705_si_003.pdf [file jm0c01705_si_003.pdf]

# Compound 5a

## Qualitative Analysis Report

**Data Filename** CBP-5-106r.d      **Sample Name** CBP-5-106 final  
**Sample Type** Sample      **Position** Vial 43  
**Instrument Name** Instrument 1      **User Name**  
**Acq Method** ESI+20-100%\_12min.m      **Acquired Time** 2/18/2016 2:38:01 PM

**IRM Calibration Status** Not Applicable      **DA Method** 102315.m

**Comment**

### User Chromatograms

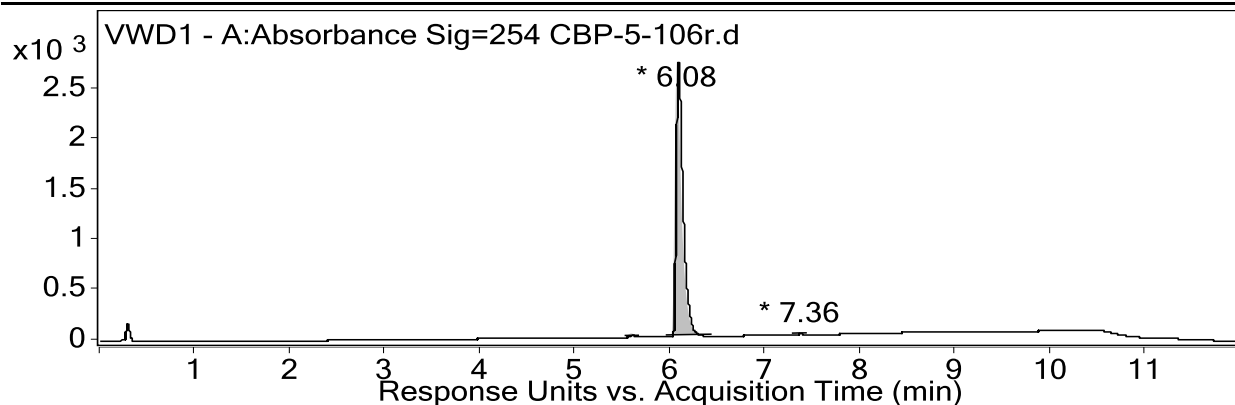

### Integration Peak List

| Peak | Start | RT   | End  | Height  | Area     | Area % |
|------|-------|------|------|---------|----------|--------|
| 1    | 5.53  | 5.6  | 5.68 | 18.98   | 66.92    | 0.49   |
| 2    | 5.96  | 6.08 | 6.45 | 2718.45 | 13654.53 | 100    |
| 3    | 7.29  | 7.36 | 7.45 | 10.28   | 33.68    | 0.25   |

**Fragmentor Voltage** 165      **Collision Energy** 0      **Ionization Mode** ESI

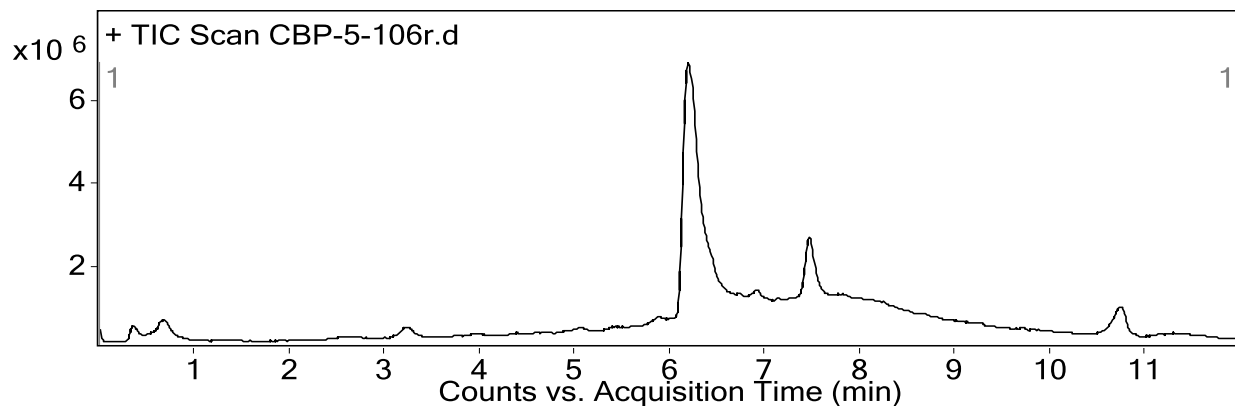

### User Spectra

**Fragmentor Voltage** 165      **Collision Energy** 0      **Ionization Mode** Esi

# Qualitative Analysis Report

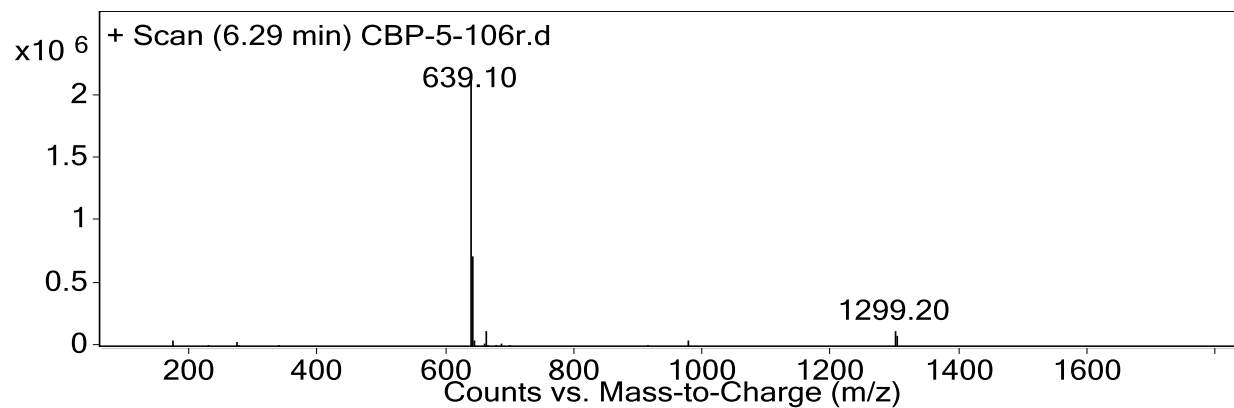

## Peak List

| <i>m/z</i> | <i>z</i> | Abund   |
|------------|----------|---------|
| 639.1      | 1        | 2148623 |
| 640.2      | 1        | 713149  |
| 641.1      | 1        | 236849  |
| 661.1      |          | 118830  |
| 1299.2     |          | 129054  |

--- End Of Report ---
