# Supplementary material
Source: PubMed Central journal article supplement (PMC7816766)
Supplement: jm0c01705_si_004.pdf [file jm0c01705_si_004.pdf]

# Compound 5o

## Qualitative Analysis Report

**Data Filename** F8-53r2.d      **Sample Name** F8-53 final  
**Sample Type** Sample      **Position** Vial 31  
**Instrument Name** Instrument 1      **User Name**  
**Acq Method** ESI+20-100%\_12min.m      **Acquired Time** 10/27/2016 4:03:18 PM  
**IRM Calibration Status** Not Applicable      **DA Method** ChromPeakSurvey-Default.m

### Comment

### User Chromatograms

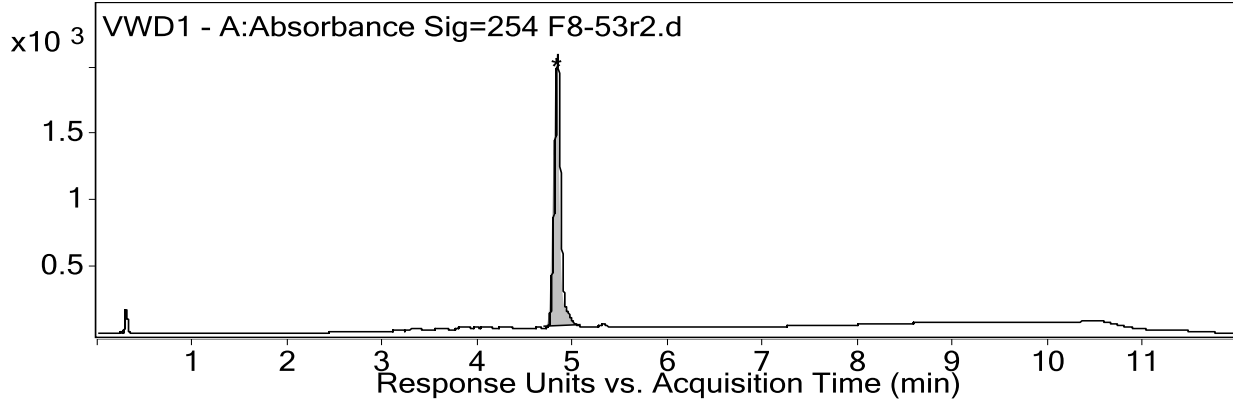

### Integration Peak List

| Peak | Start | RT   | End  | Height  | Area    | Area % |
|------|-------|------|------|---------|---------|--------|
| 1    | 4.7   | 4.83 | 5.09 | 2062.62 | 9941.13 | 100    |

**Fragmentor Voltage** 165      **Collision Energy** 0      **Ionization Mode** ESI

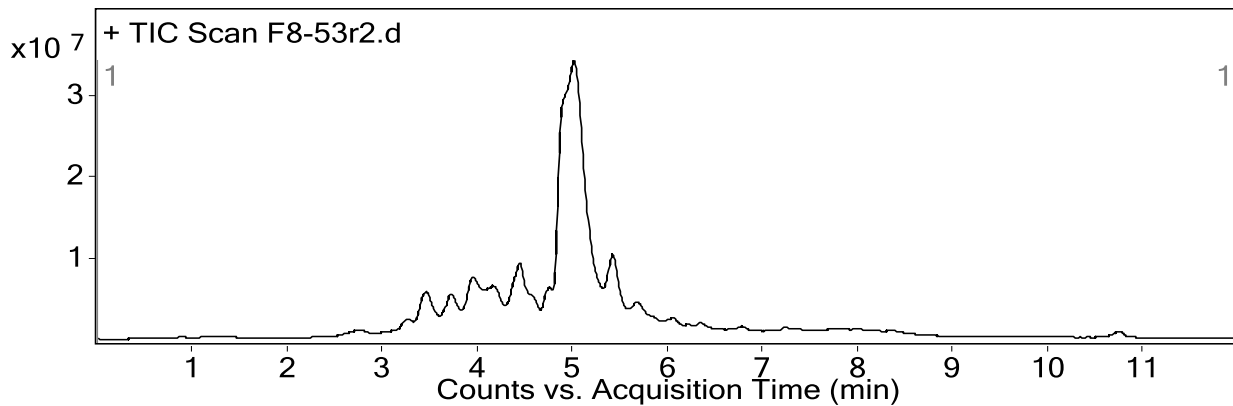

### User Spectra

**Fragmentor Voltage** 165      **Collision Energy** 0      **Ionization Mode** Esi

# Qualitative Analysis Report

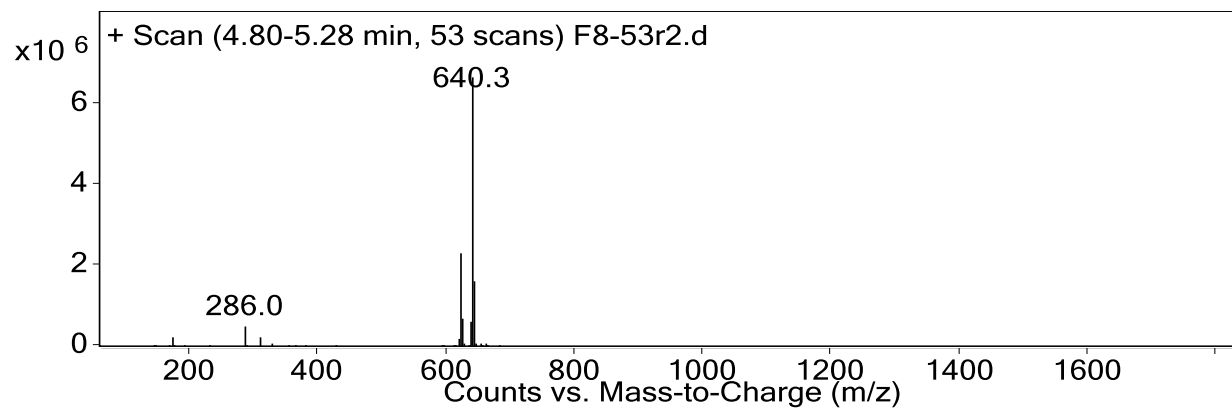

## Peak List

| <i>m/z</i> | <i>z</i> | Abund   |
|------------|----------|---------|
| 286        |          | 485073  |
| 622.1      | 1        | 2326993 |
| 623.2      | 1        | 679020  |
| 638.1      |          | 628643  |
| 640.3      | 1        | 6667776 |
| 641.2      | 1        | 4494485 |
| 642.2      | 1        | 1626888 |

--- End Of Report ---
