# Supplementary material
Source: PubMed Central journal article supplement (PMC7816766)
Supplement: jm0c01705_si_005.pdf [file jm0c01705_si_005.pdf]

# Compound 7e

## Qualitative Analysis Report

**Data Filename** KN0315.d      **Sample Name** KN0315-1  
**Sample Type** Sample      **Position** Vial 32  
**Instrument Name** Instrument 1      **User Name**  
**Acq Method** ESI+20-100%\_12min.m      **Acquired Time** 6/2/2017 12:35:50 PM  
**IRM Calibration Status** Not Applicable      **DA Method** ChromPeakSurvey-Default.m

### Comment

### User Chromatograms

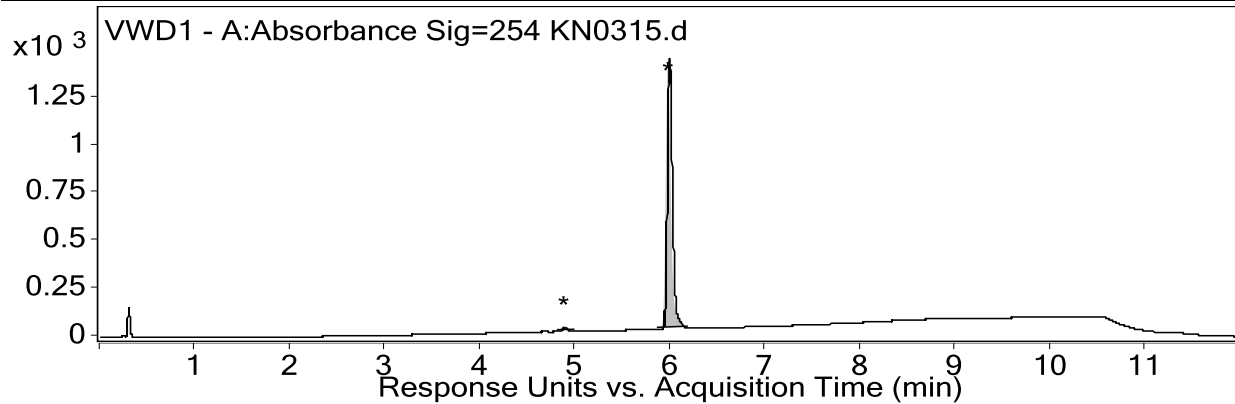

### Integration Peak List

| Peak | Start | RT   | End | Height  | Area    | Area % |
|------|-------|------|-----|---------|---------|--------|
| 1    | 4.82  | 4.89 | 5   | 20.66   | 72.41   | 1.37   |
| 2    | 5.87  | 5.99 | 6.2 | 1409.56 | 5271.02 | 100    |

**Fragmentor Voltage** 165      **Collision Energy** 0      **Ionization Mode** ESI

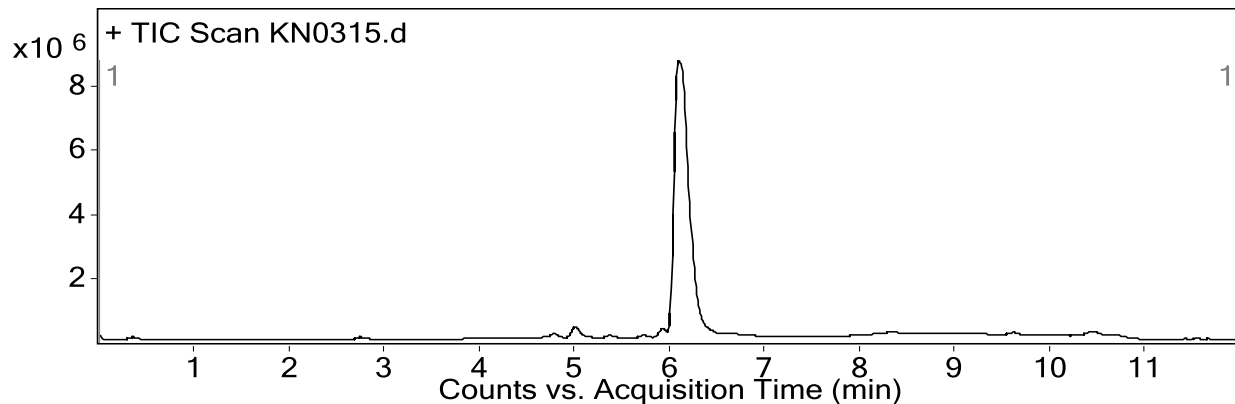

### User Spectra

**Fragmentor Voltage** 165      **Collision Energy** 0      **Ionization Mode** ESI

# Qualitative Analysis Report

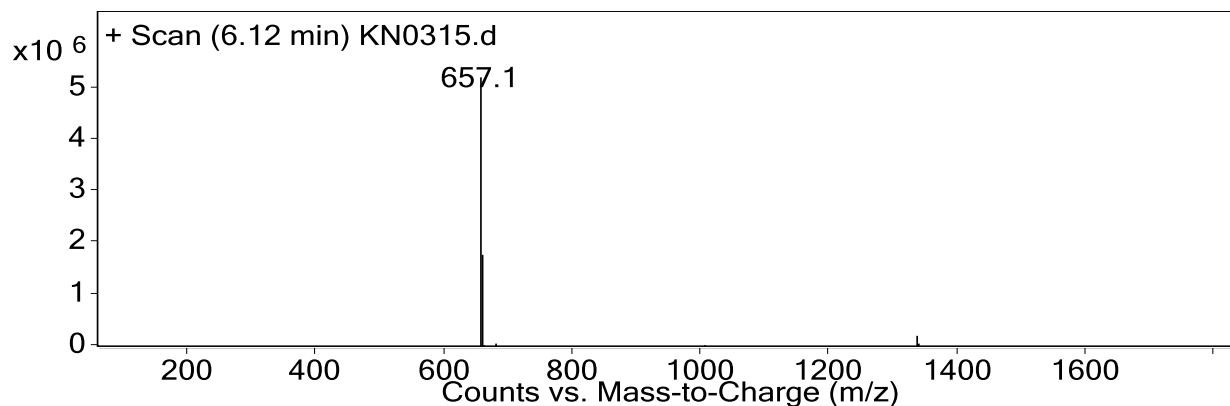

## Peak List

| m/z   | z | Abund   |
|-------|---|---------|
| 657.1 | 1 | 5208514 |
| 658   | 1 | 1777412 |
| 659.1 | 1 | 533623  |

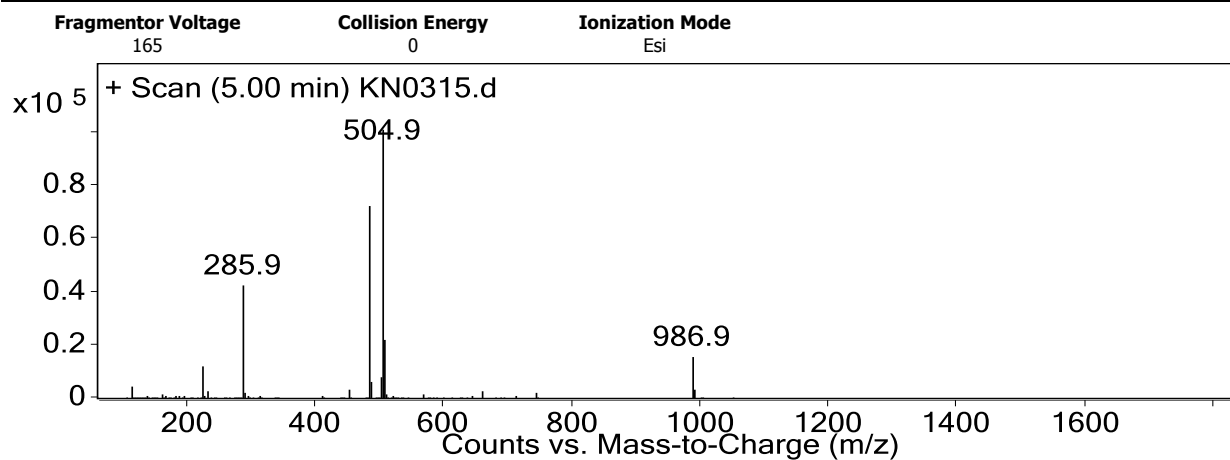

## Peak List

| m/z   | z | Abund  |
|-------|---|--------|
| 223.9 |   | 12022  |
| 285.9 |   | 42870  |
| 482.9 | 1 | 72229  |
| 484   | 1 | 15691  |
| 502   |   | 8362   |
| 504.9 | 1 | 101257 |
| 505.9 | 1 | 22249  |
| 506.9 | 1 | 7429   |
| 986.9 | 1 | 15750  |
| 987.9 | 1 | 6478   |

--- End Of Report ---
