# Supplementary material
Source: PubMed Central journal article supplement (PMC7816766)
Supplement: jm0c01705_si_006.pdf [file jm0c01705_si_006.pdf]

# Compound 7f

## Qualitative Analysis Report

**Data Filename** KN0286-1.d      **Sample Name** KN0286-1  
**Sample Type** Sample      **Position** Vial 41  
**Instrument Name** Instrument 1      **User Name**  
**Acq Method** ESI+20-100%\_12min.m      **Acquired Time** 5/16/2017 2:32:17 PM  
**IRM Calibration Status** Not Applicable      **DA Method** ChromPeakSurvey-Default.m

### Comment

### User Chromatograms

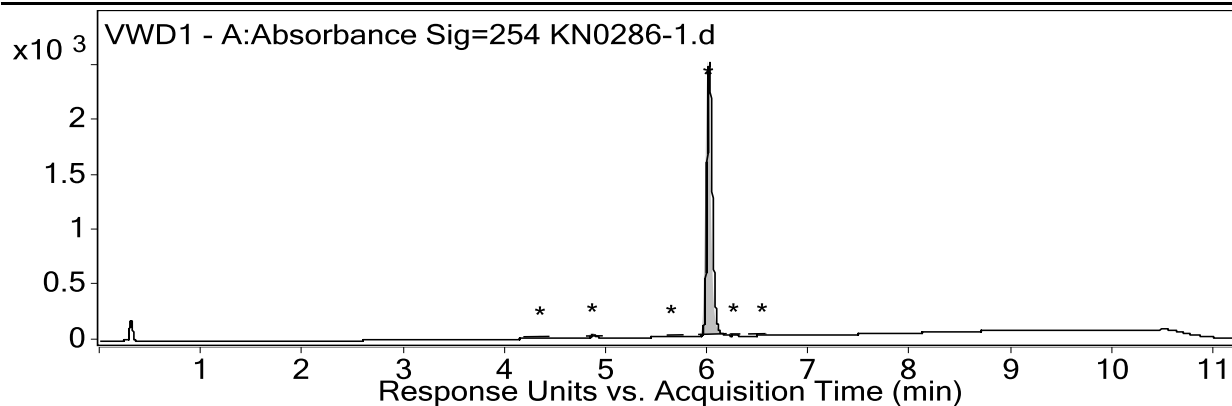

### Integration Peak List

| Peak | Start | RT   | End  | Height  | Area    | Area % |
|------|-------|------|------|---------|---------|--------|
| 1    | 4.19  | 4.35 | 4.45 | 6.47    | 32.87   | 0.36   |
| 2    | 4.81  | 4.87 | 4.97 | 27.8    | 99.57   | 1.08   |
| 3    | 5.61  | 5.65 | 5.77 | 2.7     | 11.34   | 0.12   |
| 4    | 5.92  | 6.01 | 6.2  | 2488.03 | 9229.93 | 100    |
| 5    | 6.23  | 6.27 | 6.33 | 4.38    | 14.57   | 0.16   |
| 6    | 6.41  | 6.55 | 6.59 | 1.1     | 5.94    | 0.06   |

**Fragmentor Voltage** 165      **Collision Energy** 0      **Ionization Mode** ESI

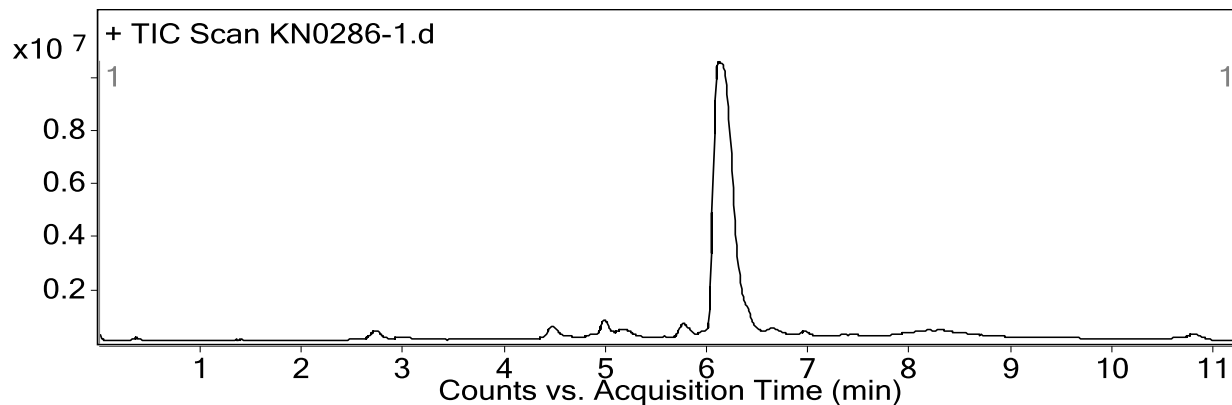

### User Spectra

**Fragmentor Voltage** 165      **Collision Energy** 0      **Ionization Mode** ESI

# Qualitative Analysis Report

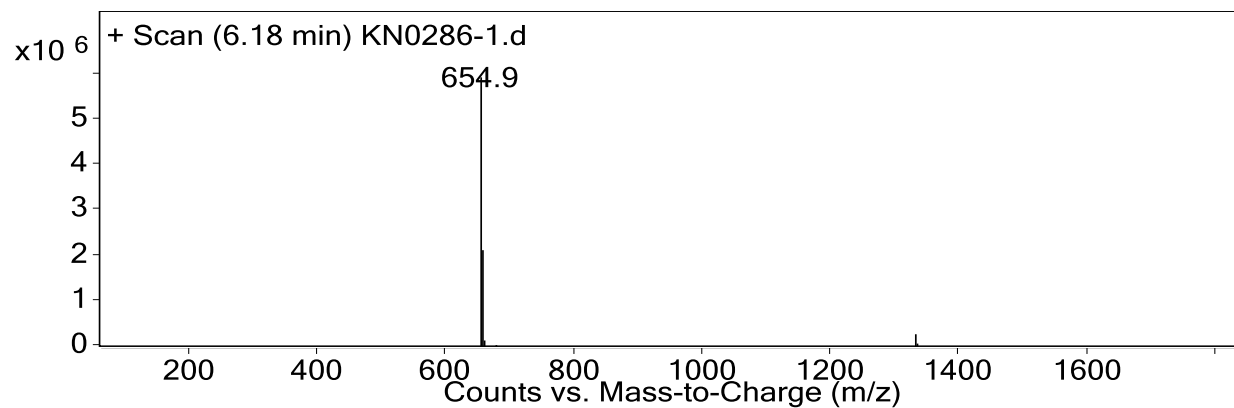

## Peak List

| <i>m/z</i> | <i>z</i> | Abund   |
|------------|----------|---------|
| 654.9      | 1        | 5934357 |
| 655.9      | 1        | 2107982 |
| 656.9      | 1        | 658473  |

--- End Of Report ---
