# Supplementary material
Source: PubMed Central journal article supplement (PMC7816766)
Supplement: jm0c01705_si_007.pdf [file jm0c01705_si_007.pdf]

## Qualitative Analysis Report

|                               |                    |                      |                      |
|-------------------------------|--------------------|----------------------|----------------------|
| <b>Data Filename</b>          | W1-P22r.d          | <b>Sample Name</b>   | W1-P22               |
| <b>Sample Type</b>            | Sample             | <b>Position</b>      | P1-E3                |
| <b>Instrument Name</b>        | Instrument 1       | <b>User Name</b>     |                      |
| <b>Acq Method</b>             | 40_90_fo_rpurity.m | <b>Acquired Time</b> | 7/12/2017 3:44:14 PM |
| <b>IRM Calibration Status</b> | Success            | <b>DA Method</b>     | Default.m            |
| <b>Comment</b>                |                    |                      |                      |

|                     |      |                       |                             |
|---------------------|------|-----------------------|-----------------------------|
| <b>Sample Group</b> |      | <b>Info.</b>          |                             |
| <b>Stream Name</b>  | LC 1 | <b>Acquisition SW</b> | 6200 series TOF/6500 series |
|                     |      | <b>Version</b>        | Q-TOF B.06.01 (B6157)       |

### User Chromatograms

**Fragmentor Voltage** 175   **Collision Energy** 0   **Ionization Mode** ESI

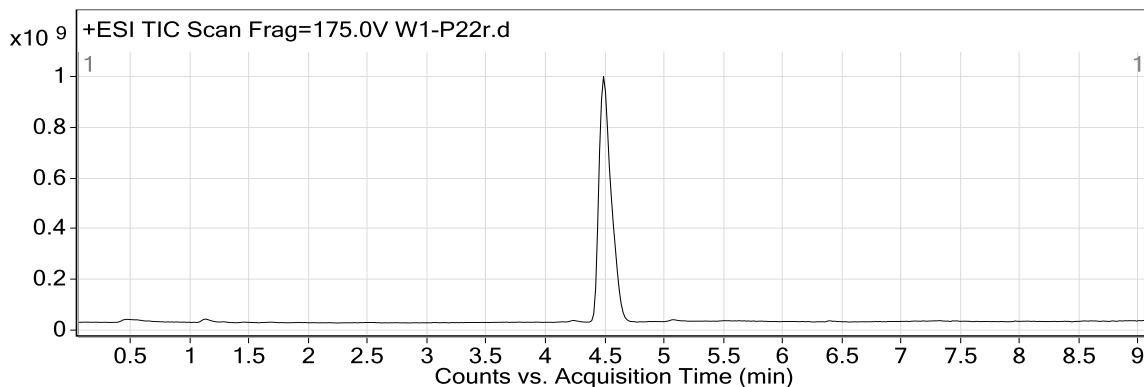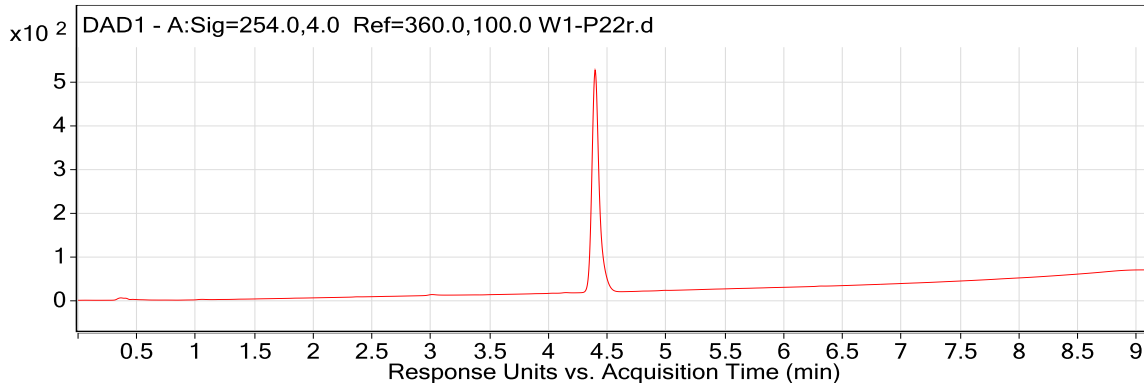

### User Spectra

**Fragmentor Voltage** 175   **Collision Energy** 0   **Ionization Mode** ESI

# Qualitative Analysis Report

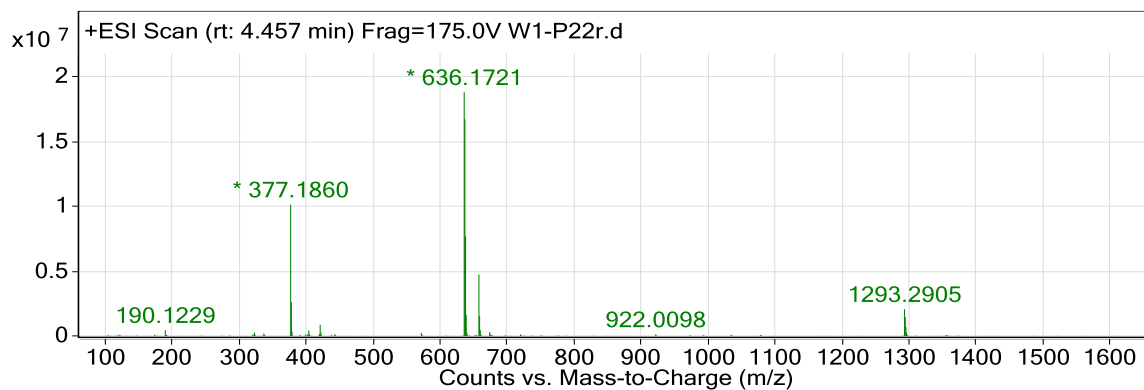

## Peak List

| <i>m/z</i> | <i>z</i> | Abund      |
|------------|----------|------------|
| 377.186    | 1        | 10151458   |
| 378.1885   | 1        | 2578313.5  |
| 636.1721   |          | 18834186   |
| 637.1651   | 1        | 16744369   |
| 638.1614   | 1        | 7681100.5  |
| 639.1613   | 1        | 1616957.38 |
| 658.1398   | 1        | 4749792    |
| 659.143    | 1        | 1516258.38 |
| 1293.2905  | 1        | 2065600.88 |
| 1294.2934  | 1        | 1440491    |

--- End Of Report ---
