# Supplementary material
Source: PubMed Central journal article supplement (PMC7816766)
Supplement: jm0c01705_si_008.pdf [file jm0c01705_si_008.pdf]

## Qualitative Analysis Report

**Data Filename** F8-150.d      **Sample Name** F8-150  
**Sample Type** Sample      **Position** Vial 2  
**Instrument Name** Instrument 1      **User Name**  
**Acq Method** ESI+20-100%\_12min.m      **Acquired Time** 4/28/2017 4:03:42 PM  
**IRM Calibration Status** Not Applicable      **DA Method** ChromPeakSurvey-Default.m

### Comment

### User Chromatograms

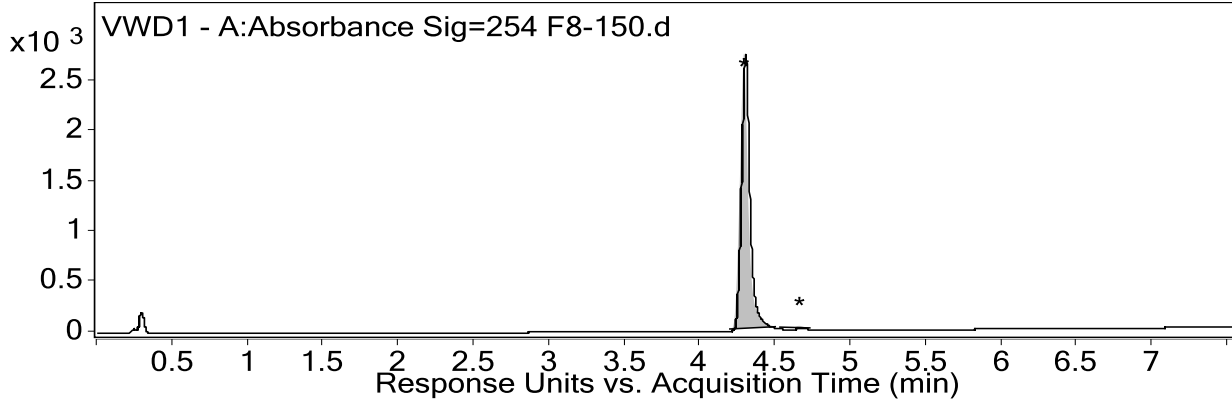

### Integration Peak List

| Peak | Start | RT   | End  | Height  | Area     | Area % |
|------|-------|------|------|---------|----------|--------|
| 1    | 4.2   | 4.3  | 4.51 | 2731.45 | 10790.87 | 100    |
| 2    | 4.53  | 4.66 | 4.74 | 17.57   | 40.2     | 0.37   |

**Fragmentor Voltage** 165      **Collision Energy** 0      **Ionization Mode** ESI

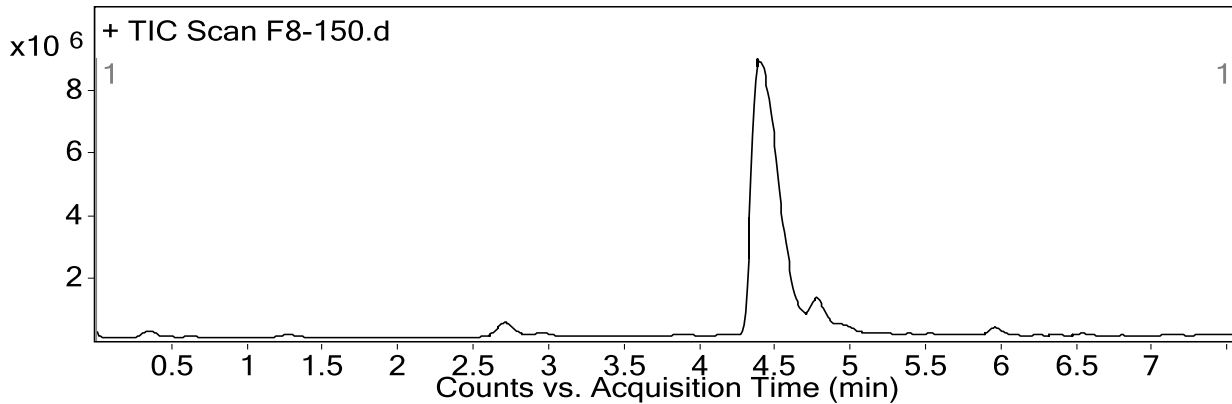

### User Spectra

**Fragmentor Voltage** 165      **Collision Energy** 0      **Ionization Mode** Esi

# Qualitative Analysis Report

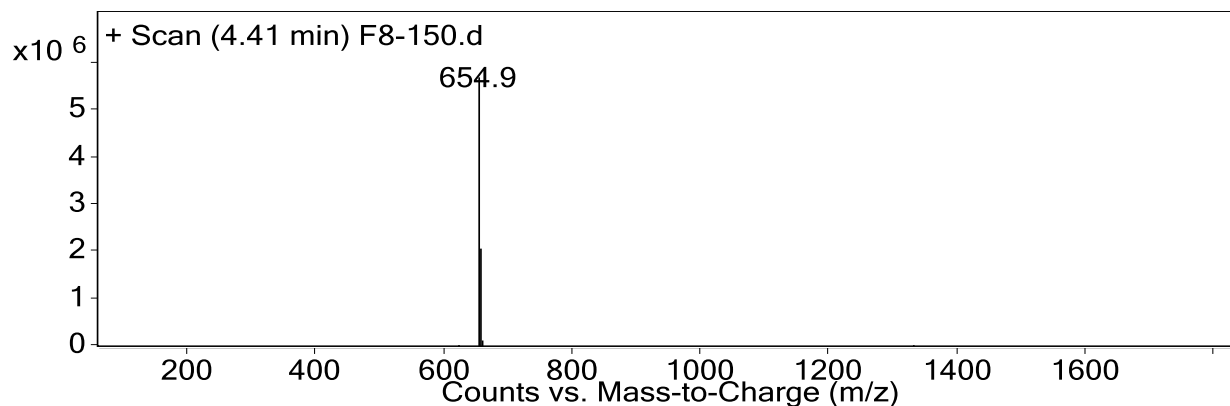

## Peak List

| m/z   | z | Abund   |
|-------|---|---------|
| 654.9 | 1 | 5718987 |
| 655.9 | 1 | 2063765 |
| 656.9 | 1 | 644758  |

Fragmentor Voltage 165 Collision Energy 0 Ionization Mode Esi

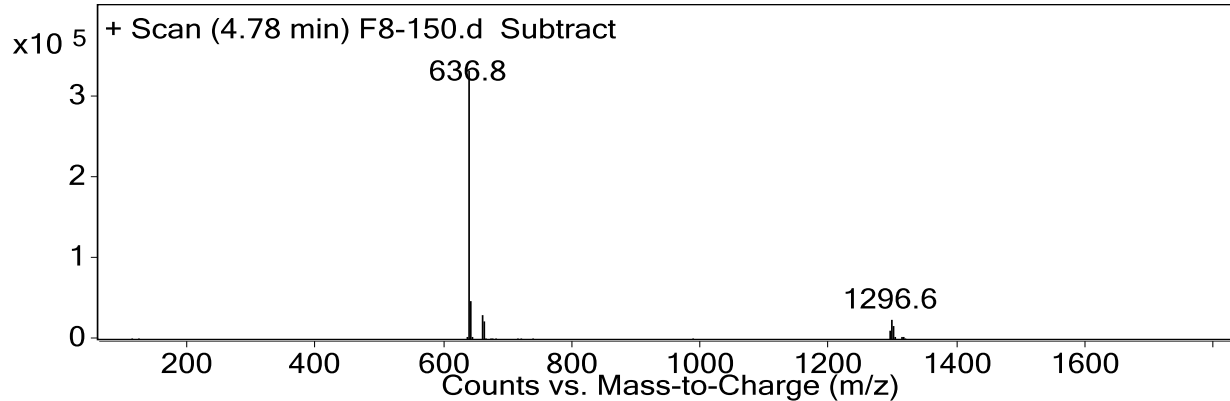

## Peak List

| m/z    | z | Abund  |
|--------|---|--------|
| 636.8  | 1 | 334151 |
| 637.9  | 1 | 107533 |
| 638.9  | 1 | 151934 |
| 639.9  | 1 | 47706  |
| 658.8  |   | 31781  |
| 660.9  |   | 23787  |
| 1296.6 |   | 25878  |
| 1298.6 |   | 17953  |

--- End Of Report ---
