# Supplementary material
Source: PubMed Central journal article supplement (PMC7816766)
Supplement: jm0c01705_si_009.pdf [file jm0c01705_si_009.pdf]

## Qualitative Analysis Report

|                               |                    |                      |                       |
|-------------------------------|--------------------|----------------------|-----------------------|
| <b>Data Filename</b>          | F8-191r.d          | <b>Sample Name</b>   | F8-191                |
| <b>Sample Type</b>            | Sample             | <b>Position</b>      | P1-E2                 |
| <b>Instrument Name</b>        | Instrument 1       | <b>User Name</b>     |                       |
| <b>Acq Method</b>             | 40_90_fo_rpurity.m | <b>Acquired Time</b> | 7/27/2017 11:51:24 AM |
| <b>IRM Calibration Status</b> | Success            | <b>DA Method</b>     | Default.m             |
| <b>Comment</b>                |                    |                      |                       |

|                     |      |                       |                             |
|---------------------|------|-----------------------|-----------------------------|
| <b>Sample Group</b> |      | <b>Info.</b>          |                             |
| <b>Stream Name</b>  | LC 1 | <b>Acquisition SW</b> | 6200 series TOF/6500 series |
|                     |      | <b>Version</b>        | Q-TOF B.06.01 (B6157)       |

### User Chromatograms

**Fragmentor Voltage** 175    **Collision Energy** 0    **Ionization Mode** ESI

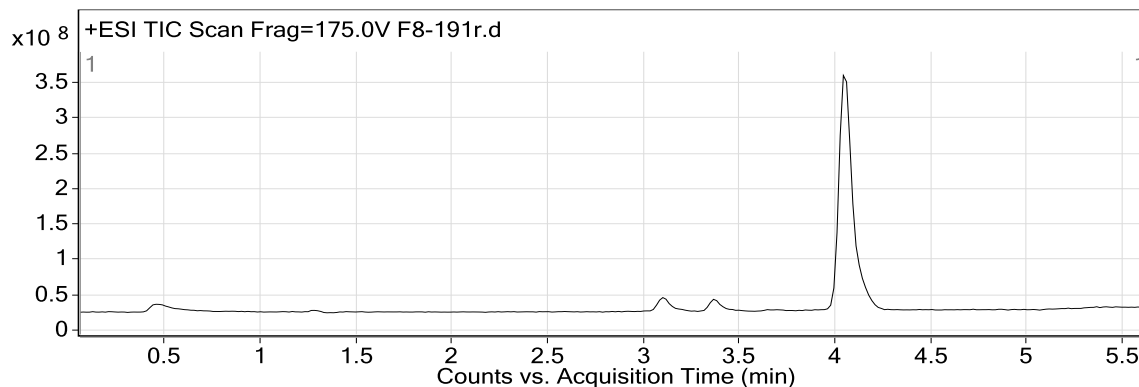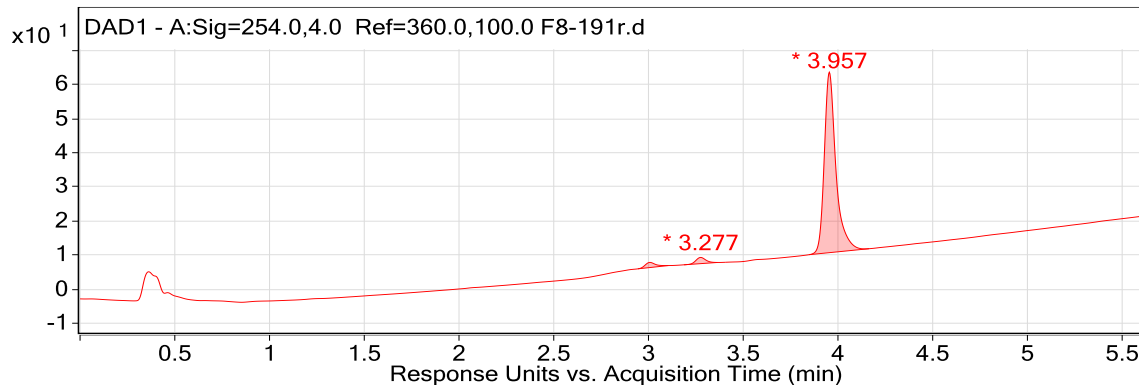

### Integration Peak List

| Peak | Start | RT    | End   | Height | Area   | Area % |
|------|-------|-------|-------|--------|--------|--------|
| 1    | 2.947 | 3.01  | 3.107 | 1.5    | 5.8    | 2.56   |
| 2    | 3.19  | 3.277 | 3.367 | 1.82   | 6.71   | 2.97   |
| 3    | 3.85  | 3.957 | 4.167 | 52.91  | 225.96 | 100    |

### User Spectra

**Fragmentor Voltage** 175    **Collision Energy** 0    **Ionization Mode** ESI

# Qualitative Analysis Report

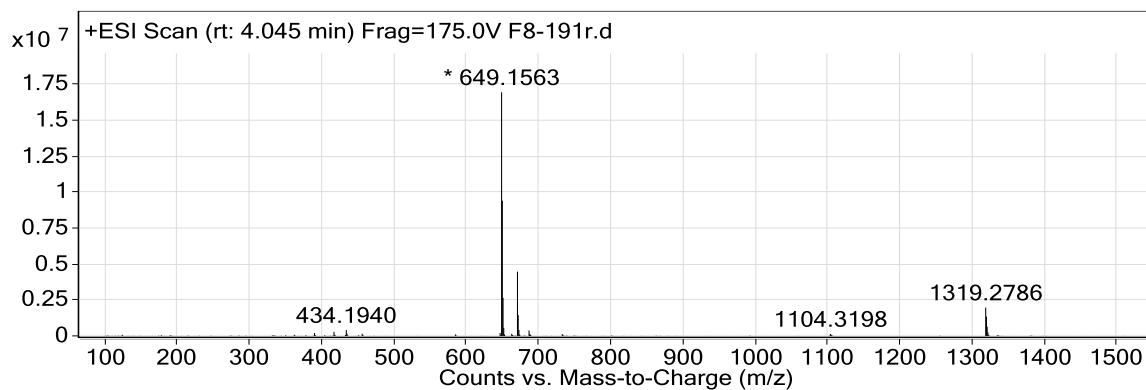

## Peak List

| <i>m/z</i> | <i>z</i> | Abund      |
|------------|----------|------------|
| 649.1563   | 1        | 16941758   |
| 650.1557   | 1        | 9394780    |
| 651.1547   | 1        | 2651068    |
| 652.1563   | 1        | 562220.06  |
| 671.1338   | 1        | 4467956.5  |
| 672.1368   | 1        | 1442381.25 |
| 673.1373   | 1        | 409655.94  |
| 1319.2786  | 1        | 1970475.13 |
| 1320.282   | 1        | 1342992.63 |
| 1321.2843  | 1        | 635530.19  |

--- End Of Report ---
